# 1 SOX2<sup>+</sup> sustentacular cells are stem cells of the postnatal adrenal medulla

2

3 Alice Santambrogio<sup>1,2,\*</sup>, Yasmine Kemkem<sup>1,\*</sup>, Thea L. Willis<sup>1</sup>, Ilona Berger<sup>1,2</sup>, Maria Eleni Kastri<sup>3</sup>, Louis  
4 Faure<sup>3</sup>, John P. Russell<sup>1</sup>, Emily J. Lodge<sup>1</sup>, Val Yianni<sup>1</sup>, Rebecca J. Oakey<sup>4</sup>, Barbara Altieri<sup>5</sup>, Stefan R.  
5 Bornstein<sup>2,6,7</sup>, Charlotte Steenblock<sup>2</sup>, Igor Adameyko<sup>3,8</sup>, Cynthia L. Andoniadou<sup>1,2</sup>

6

7 1 Centre for Craniofacial and Regenerative Biology, King's College London, London, SE1 9RT, United  
8 Kingdom

9 2 Department of Medicine III, University Hospital Carl Gustav Carus, Technische Universität Dresden,  
10 Fetscherstrasse 74, 01307 Dresden, Germany

11 3 Department of Neuroimmunology, Center for Brain Research, Medical University Vienna, Vienna,  
12 1090 Austria

13 4 Department of Medical and Molecular Genetics, King's College London, SE1 9RT, United Kingdom

14 5 Department of Internal Medicine I, Division of Endocrinology and Diabetes, University Hospital,  
15 University of Würzburg, Germany

16 6 Division of Diabetes and Nutritional Sciences, King's College London, London, SE1 9RT, United  
17 Kingdom

18 7 Department of Endocrinology, Diabetology and Clinical Nutrition, University Hospital Zurich (USZ)  
19 and University of Zurich (UZH), 8091 Zurich, Switzerland Department of Endocrinology, Diabetology  
20 and Clinical Nutrition, University Hospital Zurich (USZ) and University of Zurich (UZH), 8091 Zurich,  
21 Switzerland

22 8 Department of Physiology and Pharmacology, Karolinska Institutet, Stockholm, 17165 Sweden

23

24 \*These authors contributed equally to this work

25

26

27

28

## 29 **Summary**

30 Renewal of the catecholamine-secreting chromaffin cell population of the adrenal medulla is

31 necessary for physiological homeostasis throughout life. Definitive evidence for the presence or

32 absence of an adrenomedullary stem cell has been enigmatic. In this work, we demonstrate that a

33 subset of sustentacular cells endowed with a support role, are in fact adrenomedullary stem cells.

34 Through genetic tracing and comprehensive transcriptomic data of the mouse adrenal medulla, we

35 show that cells expressing *Sox2*/SOX2 specialise as a unique postnatal population from embryonic

36 Schwann Cell Precursors and are also present in the normal adult human adrenal medulla. Postnatal

37 SOX2<sup>+</sup> cells give rise to chromaffin cells of both the adrenaline and noradrenaline lineages *in vivo* and

38 *in vitro*. We reveal that SOX2<sup>+</sup> stem cells have a second, paracrine role in maintaining adrenal

39 chromaffin cell homeostasis, where they promote proliferation through paracrine secretion of WNT6.

40 This work identifies SOX2<sup>+</sup> cells as a true stem cell for catecholamine-secreting chromaffin cells.

41

## 42 **Keywords**

43 Stem cell, SOX2, adrenal medulla, endocrine, chromaffin, homeostasis

44

## 45 **Introduction**

46 The adrenal medulla is responsible for the body's reaction to acute stress and mediates the "fight or  
47 flight" response through the production and release of the catecholamines adrenaline, noradrenaline  
48 and low levels of dopamine, by specialised neuroendocrine chromaffin cells. Catecholamines target  
49 multiple organs to help increase oxygenation of muscles, blood pressure and heart output, blood sugar  
50 levels, attention and focus, and promote vasoconstriction as well as enhance memory performance  
51 <sup>1,2</sup>. Diseases of the adrenal, such as congenital adrenal hyperplasia, dopamine beta-hydroxylase  
52 deficiency and tumours (pheochromocytomas and the related paragangliomas) lead to disruption in  
53 catecholamine regulation with life-threatening consequences <sup>3-5</sup>.

54 The study of adrenal medulla homeostasis, the consequences of homeostatic perturbation, and  
55 prospects for regenerative approaches are lacking due to an incomplete characterisation of cell types  
56 in this organ. Previous *in silico* studies of the adrenal gland have delivered insights into adrenocortical  
57 cell transcriptome but failed to provide a characterisation of adrenomedullary cell subtypes. This is  
58 mostly due to cell isolation protocols being optimised for the adrenal cortex, resulting in very low  
59 viable cell numbers from the medulla <sup>6-8</sup>. The existence of a putative adrenomedullary stem cell,  
60 capable of giving rise to new chromaffin cells *in vivo*, has previously been postulated but not identified  
61 <sup>9-11</sup>. Instead, divisions in this slow-turnover organ have been attributed to chromaffin cells <sup>12,13</sup>. The  
62 poor understanding of the adrenomedullary transcriptomic landscape has even hindered the  
63 discovery of specific cell markers within the heterogeneous chromaffin subtypes, such as the



64 noradrenaline-producing chromaffin cells which, lacking a specific marker, are instead identified by  
65 the lack of expression of phenylethanolamine N-methyltransferase (PNMT), which catalyses the  
66 conversion of noradrenaline to adrenaline<sup>6-8</sup>.

67 In this work, using single-cell RNA sequencing with cell isolation methods optimised for  
68 adrenomedullary cells, we identify a postnatal adrenomedullary stem cell population expressing the  
69 transcription factor SOX2. Through *in vivo* lineage tracing and *in ovo* assays, we demonstrate that  
70 these are a specialised long-lived population of stem cells originating and specialising from the  
71 embryonic precursors of the adrenal medulla, termed Schwann cell precursors (SCPs)<sup>14-16</sup>. These adult  
72 SOX2+ stem cells contribute to the generation of new noradrenaline- and adrenaline-secreting  
73 chromaffin cells throughout life and promote organ proliferation through paracrine signalling. The  
74 identification of this novel adrenomedullary stem cell population holds promise for applications in  
75 regenerative medicine in neuroendocrine structures and constitutes an ideal target for oncogenic  
76 mutations known to cause pheochromocytomas and paragangliomas, which present some of the  
77 highest rates of gene heritability across all tumours.

78

## 79 **Results**

80 *Transcriptomic analysis elucidates cell composition of the postnatal adrenal medulla and identifies a*  
81 *putative progenitor/stem cell population.*

82

83 To investigate the postnatal cell composition of the adrenal medulla, we performed droplet-based  
84 single-cell RNA sequencing on 10 mouse adrenals that were manually dissected to remove the  
85 majority of the cortex, at postnatal day (P) 15, during the rapid growth phase of the gland<sup>17</sup> (schematic  
86 Figure 1A) (*n* = 5 mice, mixed sex). Adrenomedullary cells were subset *in silico* using markers listed in  
87 Figure S1B, and all cortex, endothelial and immune cell types were excluded (Figure S1A, B). Following  
88 quality control (Figure S1C, D) unsupervised clustering of 2708 medullary cells revealed 8 distinct

89 transcriptional signatures (Figure 1B,C). Cluster identity was assigned based on differential expression  
90 of known cell markers (Figure 1D).

91

92 All chromaffin cells express tyrosine hydroxylase (TH), which converts tyrosine to L-DOPA, the  
93 precursor of dopamine. The action of dopamine- $\beta$ -hydroxylase, encoded by *Dbh*, converts dopamine  
94 into noradrenaline, and subsequently, phenylethanolamine N-methyltransferase (PNMT) converts  
95 noradrenaline to adrenaline. Two types of chromaffin cells exist; a first type that expresses PNMT and  
96 secretes adrenaline, and a second type, present in the minority, not expressing PNMT and secreting  
97 noradrenaline. The differentiated chromaffin cells were further divided into 5 clusters: three  
98 consistent with adrenaline-producing signatures (Clusters 0 – 821 cells, 1 – 717 cells, 5 – 105)  
99 expressing *Chga*, *Th*, *Ddc*, *Dbh* and *Pnmt*, revealing heterogeneity amongst this population; one  
100 noradrenaline-producing (Cluster 2 – 382 cells) expressing *Chga*, *Th*, *Ddc* and *Dbh* but not *Pnmt*. In the  
101 literature, postnatal noradrenaline chromaffin cells were so far only recognised owing to the lack of  
102 *Pnmt* expression and were lacking identifying markers. Our study identifies three such unique markers  
103 expressed both within clusters 2 as well as the less-committed cluster 3, *Cox8b*, *Lix1* and *Penk* (Figure  
104 S1E). *Penk* encodes a preproprotein, whose products have previously been identified in chromaffin  
105 cell extracts<sup>18</sup>. Immunofluorescence staining for PENK, demonstrates overlap with TH, marking all  
106 chromaffin cells, and mutually exclusive expression with PNMT, marking adrenaline-producing  
107 chromaffin cells (Figure S1F). We therefore consider PENK a reliable marker of noradrenaline  
108 chromaffin cells and further confirm its expression in human normal adrenal (Figure S1G). Consistent  
109 with previous literature<sup>12,13</sup>, we additionally identify a fifth cluster of committed chromaffin cells,  
110 designated as cycling chromaffin cells (cluster 7 Cycling Chr – 92 cells) expressing chromaffin cell  
111 markers (including both *Pnmt* and *Penk*), as well as *Mki67* and *Top2a*. Cell cycle analysis confirmed  
112 that the majority of cluster 7 cells were in the G2M phase. Cells in G2M were also identified across all  
113 clusters, including sustentacular cells (Figure 1E).

114

115 We detected the presence of a cluster not expressing any chromaffin cell markers, indicative of  
116 possible progenitor/stem cells. This was designated as the sustentacular cell cluster, based on the  
117 known expression of markers of previously-described sustentacular cells, a signature partly shared by  
118 SCPs, the embryonic progenitors of the adrenal medulla. These included markers *Plp1*, *Lgi4*, *Fabp7*,  
119 *Sfrp1* and *Cdh19*<sup>14,19</sup> (Cluster 4 - 170 cells), (Figure 1F, S1H). The stem/progenitor markers *Sox10*,  
120 *S100b*, *Gfap* were expressed among this postnatal population, as well as *Sox2*, not previously reported  
121 but a marker of multiple progenitor/stem cells<sup>20-23</sup> (Figure 1F). These genes all exhibited  
122 transcriptional heterogeneity amongst the sustentacular cell population and were additionally  
123 expressed, albeit at reduced expression levels, in two additional clusters. These were designated  
124 transitioning cell clusters (Clusters 3 T-NorAdrChr – 328 cells and 6 T-AdrChr – 93 cells), as they shared  
125 transcriptional signatures with both chromaffin and sustentacular cell markers and are likely  
126 committing progenitors of the two types of differentiated chromaffin cells (Figure 1D, S1I). This  
127 observation is supported by pseudotime inference, which predicts chromaffin cells arising from  
128 sustentacular cells via the transitioning clusters (Figure S1J). In summary, these data support the  
129 presence of a postnatal adrenomedullary progenitor/stem cell population within the previously  
130 termed sustentacular cells and indicate two branches of progenitors during commitment to either  
131 noradrenaline- or adrenaline-producing chromaffin cells.

132

133 *SOX2<sup>+</sup> postnatal cells are a distinct SCP-derived subpopulation of sustentacular cells, present in the*  
134 *adrenal medulla throughout life.*

135

136 We next sought to determine if the expression of SOX2 marks a distinct subset of this sustentacular  
137 cell population. Immunohistochemistry using antibodies against SOX2 on sections of murine adrenals  
138 revealed that SOX2<sup>+</sup> cells are present in the adrenal medulla during the early postnatal period and  
139 adulthood (Figure 2A). Quantification of SOX2<sup>+</sup> cells as a proportion of the total cells in the medulla  
140 reveals an increase in SOX2<sup>+</sup> cell proportion between P15 and P17 (4.95% to 7.04%), followed by a

141 gradual decrease until P42 and maintenance of the proportion of SOX2<sup>+</sup> cells until P365 (Figure 2B).  
142 We did not observe a difference in SOX2<sup>+</sup> cell proportions between sexes (Figure S2A), of relevance  
143 since previous reports indicate a discrepancy in the volume of murine medulla based on sex<sup>17</sup>.  
144 Immunostaining for SOX2 in human adrenals into advanced age (from patients aged 17, 29, 48, 55, 56,  
145 71), confirms the presence of SOX2<sup>+</sup> cells in the human adrenal medulla (Figure S2B). To validate  
146 overlap with sustentacular markers we used the *Sox2*<sup>eGFP/+</sup> mouse line where EGFP is expressed under  
147 the control of *Sox2* regulatory elements<sup>21</sup> and confirmed that all SOX2<sup>+</sup> cells express EGFP (Figure  
148 S2C). Double-immunofluorescence staining confirms that SOX2<sup>+</sup> cells express classical sustentacular  
149 cell markers SOX10, S100B and GFAP (Figure 2C). RNAscope mRNA *in situ* hybridisation confirms  
150 transcripts of both *Sox2* and *S100b* or *Gfap* in the same cells and additionally reveals overlap of *Sox10*  
151 and *Plp1* with *Sox2*, affirming the shared signature with SCPs (Figure 2D). Analysis of a published  
152 developmental SCP dataset (Kastriti et al. 2022) reveals that *Sox2* is expressed among ‘multipotent  
153 hub’ cells, and that *Sox10* expression precedes *Sox2* expression in the chromaffin cell commitment  
154 trajectory (Figure 2E). The *Sox2* regulon is active in the uncommitted state of the chromaffin  
155 commitment trajectory (Figure S2D). The top 10 markers correlated with *Sox2* expression across all  
156 cells include genes highly expressed in postnatal sustentacular cells (*Fabp7*, *Sparc*, *Zfp36l1*, *Serpine2*  
157 *Sox10*), and the Hippo pathway regulator *Wwtr1* (Figure S2E and F). Anti-correlated genes (analysis  
158 only among *Sox2*-expressing cells) include chromaffin cell markers *Chga*, *Chgb* and *Th* (Figure S2G),  
159 supporting the notion that *Sox2* expression needs to be downregulated for acquisition of a chromaffin  
160 cell state. To determine if these SOX2<sup>+</sup> sustentacular cells are indeed derived from SCPs in the embryo,  
161 we carried out lineage tracing of embryonic SCPs. Using *Wnt1*<sup>Cre/+</sup>;*R26*<sup>mTmG/+</sup> we labelled the neural  
162 crest from its specification and using *Sox10*<sup>iCreERT2/+</sup>;*R26*<sup>mTmG/+</sup> we induced SCPs at 11.5dpc, at a time  
163 when they begin to migrate towards the dorsal aorta, subsequently giving rise to the adrenal medulla.  
164 Immunofluorescence staining using GFP and SOX2 antibodies, reveals that descendants of *Wnt1* and  
165 *Sox10* expressing cells (GFP+) include the entire SOX2<sup>+</sup> population at P15 (Figure 2F, G). In order to  
166 determine if postnatal SOX2<sup>+</sup> cells are a distinct specialised cell type from SCPs, we compared the

167 signatures of SCPs and postnatal SOX2<sup>+</sup> cells. Isolation of a flow-purified population enriched for SOX2<sup>+</sup>  
168 cells using the *Sox2*<sup>eGFP/+</sup> mouse line, allowed single-cell RNA sequencing of 1563 cells, 493 of which  
169 are expressing high levels of *Sox2* (Figure S3A). Comparison of the transcriptomic signature of *Sox2*<sup>High</sup>-  
170 expressing subset to SCPs identifies that postnatal SOX2<sup>+</sup> cells have a distinct signature, supporting  
171 that these have become a specialised population of progenitor/stem cells (Figure S3B, C). STRING  
172 analysis of the top differentially expressed genes reveal that SOX2<sup>+</sup> postnatal cells differentially  
173 express a hub of extracellular matrix-related genes including *Col4a1*, *Col4a2*, *Col28a1*, *Col26a1* and a  
174 hub signalling/transcription factors including *Fos*, *Fosb*, *Egr1*, *Ier2*, *Klf2*, *Ctgf* (Figure S3D). In summary,  
175 *Sox2*-expressing cells of the postnatal adrenal medulla are derived from SCPs and are a distinct  
176 uncommitted postnatal population.

177

178 *Isolated Sox2-expressing stem cells self-renew and give rise to new chromaffin cells ex vivo.*

179

180 To determine if *Sox2*-expressing cells have the potential for self-renewal, we cultured dissociated  
181 adrenomedullary cells in stem-cell promoting media under adherent conditions. Flow sorting of EGFP<sup>+</sup>  
182 and EGFP<sup>-</sup> cells from *Sox2*<sup>eGFP/+</sup> mice at P15 and plating in clonogenic conditions, showed that EGFP<sup>+</sup>  
183 (SOX2<sup>+</sup>) cells only, can give rise to colonies, which can be passaged (Figure 3A, B, S4A-C). These colonies  
184 contained an expanded population of SOX2<sup>+</sup> cells as revealed by immunofluorescence staining and by  
185 flow cytometry for EGFP expression (Figure 3C, D). These data combined, render *Sox2*-expressing cells  
186 as a putative postnatal stem cell population. To establish if SOX2<sup>+</sup> cells alone are sufficient to give rise  
187 to chromaffin cells, we took advantage of a well-established *in vivo* xenograft culture technique,  
188 chorioallantoic membrane (CAM) culture, in chicken embryos <sup>24</sup>. This allows culture of three-  
189 dimensional vascularised tissues in an *in vivo* environment, enabling long-term maintenance. We first  
190 used our newly-established *in vitro* culture system to isolate and expand postnatal SOX2<sup>+</sup> stem cells  
191 over 8 days, at which point they are mostly uncommitted, as revealed by EGFP detection by flow  
192 sorting (Figure 3D). Purified SOX2<sup>+</sup> cell suspensions (800,000 cells, purified and expanded from 4-6

193 animals) were grafted onto the embryonic CAM (Figure 3E). Collection of the xenografts 10 days later,  
194 revealed that SOX2<sup>+</sup> cells can give rise to compact three-dimensional tissues ( $n=4$  out of 10 CAM  
195 assays, Figure 3F). Endogenous expression of EGFP was detectable in the grafts at collection,  
196 suggesting the presence of SOX2<sup>+</sup> cells (Figure 3F). Immunofluorescence staining using antibodies  
197 against chromaffin cell markers TH and PNMT (adrenaline-expressing chromaffin cells), confirms that  
198 grafts contain differentiated chromaffin cells ( $n=3$  grafts, Figure 3G).

199

200 *Postnatal SOX2<sup>+</sup> cells of the adrenal medulla are stem cells in vivo*

201

202 To establish if SOX2<sup>+</sup> cells function as stem cells during homeostasis *in vivo*, we labelled and lineage-  
203 traced Sox2-expressing cells in the postnatal adrenal. Tamoxifen induction of Sox2<sup>CreERT2/+</sup>; R26<sup>mTmG/+</sup>  
204 animals was carried out by single injection at P14 and adrenals collected after 72h (P17), 7 days (P21),  
205 14 days (P28), 28 days (P42), 70 days (P84) and 178 days (P192) (Figure 4A). No-Cre controls or  
206 injection with corn oil instead of tamoxifen, did not result in GFP expression (Figure S4D). Lineage  
207 tracing over 178 days reveals an expansion of GFP<sup>+</sup> clones in the adrenal medulla (Figure 4B).  
208 Quantification of GFP<sup>+</sup> as a proportion of the total nuclei demonstrates an increase over time: initial  
209 labelling of 3.4% GFP<sup>+</sup> cells at 72h post-induction to 10.67% at 178 days post-induction (Figure 4C).  
210 Double-immunofluorescence staining with antibodies against GFP and general chromaffin marker TH,  
211 adrenaline-producing chromaffin marker PNMT and the newly identified noradrenaline-producing  
212 chromaffin marker PENK, confirms GFP<sup>+</sup> cells double-stained with either marker, confirming the  
213 derivation of both adrenaline- and noradrenaline-producing chromaffin cells from SOX2<sup>+</sup>  
214 sustentacular progenitors (Figure 4D). Lineage tracing in adult mice induced at P189 (27 weeks  $n=4$ )  
215 and analysed 28 days later (P217), reveals the *in vivo* potential of Sox2-expressing cells to generate  
216 chromaffin cells is retained in later life ( $n=3$ , Figures 4E). Taken together, our data therefore  
217 demonstrate that SOX2<sup>+</sup> adrenomedullary cells are *bona fide* stem cells.

218

219 *SOX2<sup>+</sup> adrenomedullary stem cells produce paracrine WNT signals that promote expansion of*  
220 *surrounding endocrine cells*

221

222 We previously reported that SOX2<sup>+</sup> stem cells of a different endocrine organ, the anterior pituitary  
223 gland, are instrumental to promote postnatal organ proliferation in a paracrine manner, through the  
224 secretion of WNT ligands<sup>25</sup>. To determine if SOX2<sup>+</sup> stem cells of the adrenal medulla share this non-  
225 classical stem cell contribution to organ turnover, we mined our single-cell RNA s9equencing dataset  
226 of the mouse adrenal medulla to first explore the cell types that upregulate the WNT pathway. We  
227 found that WNT pathway targets *Lef1* and *Axin2* are both expressed in chromaffin cells, with a bias for  
228 the noradrenaline (*Lef1*) and adrenaline (*Axin2*) lineages. *Lgr5*, a WNT pathway potentiator and target  
229 is strongly expressed in all committed chromaffin cell clusters. All three targets are expressing in the  
230 cycling chromaffin cell cluster (cluster 7) (Figure 5A). Upregulation of canonical WNT signalling in  
231 chromaffin cells was confirmed through immunofluorescence against TH on the TCF/Lef:H2B-GFP  
232 reporter line, showing activation of GFP (WNT-responding cells) among TH<sup>+</sup> chromaffin cells (Figure  
233 5B). Expression of all three WNT targets was absent from the sustentacular/stem cell cluster. To  
234 determine the source of WNT ligands we queried expression of all mouse *Wnt* genes. *Wnt1, 2, 2b, 3a,*  
235 *5b, 7a, 7b, 8a, 8b, 9a, 9b, 10a, 10b,* and *11* were not expressed in any adrenomedullary cell population.  
236 Low expression of *Wnt3, 4, 5a* and *16* was detected in sporadic cells across different clusters (Figure  
237 S5A). Expression of *Wnt6* was strong in the sustentacular/stem cell cluster, and detectable but weak  
238 in the two transitioning noradrenaline and adrenaline clusters (Figure 5C). Expression of *Wnt* genes  
239 within the isolated SOX2-EGFP<sup>+</sup> cells confirmed robust expression of *Wnt6* as the sole *Wnt* gene  
240 (Figure 5C). Double mRNA in situ hybridisation using probes against *Wnt6* and *Sox2*, confirms specific  
241 expression of *Wnt6* in this stem cell population (Figure 5D, *n*=3). WLS (GPR177) is a glycoprotein  
242 receptor necessary for WNT secretion. *Wls* expression was detected across all populations of the  
243 adrenal medulla including the SOX2<sup>+</sup> cells (Figure 5E). We specifically deleted *Wls* in SOX2<sup>+</sup> cells  
244 (*Sox2<sup>CreERT2/+</sup>; Wls<sup>fl/fl</sup>*) in a tamoxifen-inducible manner. Mice were induced at P21 and adrenals collected

245 at P26. Immunofluorescence staining using antibodies against Ki-67 to mark cycling cells, revealed a  
246 reduction in overall proliferation in adrenal medullae deficient in *Wls* expression (lack of WNT  
247 secretion) from SOX2<sup>+</sup> cells (Figure 5G, *n*=6-8 per genotype). These results confirm that SOX2<sup>+</sup> cells  
248 promote proliferation in the adrenal medulla, through paracrine secretion of WNT6.

249

## 250 **Discussion**

251

252 Here, we reveal the existence of postnatal adrenomedullary stem cells, which give rise to new  
253 chromaffin cells of both the adrenaline and the noradrenaline lineages throughout life, as well as  
254 contribute to the normal turnover of chromaffin cells through paracrine signalling. Employing *in vivo*  
255 studies in mouse, we confirm that this specialised *Sox2*-expressing somatic stem cell population  
256 derives from *Sox10*-expressing embryonic Schwann cell precursors of the neural crest and becomes a  
257 stem cell population distinct from SCPs. Comprehensive single-cell transcriptome analyses of the  
258 murine adrenal medulla were lacking from the literature, since methodologies to dissociate adrenal  
259 tissue favour the cortex, with low medullary cell survival. These reveal the molecular features of  
260 adrenomedullary stem cells, and clearly identify them as the cells of origin of noradrenaline- and  
261 adrenaline-expressing chromaffin subtypes, with distinct transitioning progenitors. Genetic lineage  
262 tracing of *Sox2*-expressing cells, confirms the generation of new chromaffin cells of both types  
263 throughout postnatal life. The transcriptomic datasets presented can be exploited further by the  
264 community, and as proof-of-concept, we present their use for identification of noradrenaline-specific  
265 markers, where previously noradrenaline-secreting chromaffin cells were identified only through their  
266 lack of marker expression. Validation of PENK as a marker of noradrenaline cells in mouse and human  
267 is demonstrated, which can be useful in human pathology, the study of noradrenaline cells and  
268 expansion of the genetic toolkit of mouse models in adrenal research (e.g. *Penk-Cre* mice)<sup>26</sup>.

269

270 Previously, it was unknown if an adrenomedullary stem cell population exists or if new chromaffin



271 cells are only generated from self-duplication<sup>27</sup>. In this study, we not only demonstrate the potential  
272 of SOX2<sup>+</sup> cells *in vivo*, but show that they can be cultured and expanded *in vitro* and generate tissue  
273 containing neuroendocrine cells when explanted, here illustrated using an *in ovo* system. The culture  
274 systems we established can be further exploited for stem cell-based regenerative approaches in  
275 relation to disorders implicating the adrenal medulla e.g. adrenal hypoplasia or dopamine  $\beta$ -  
276 hydroxylase deficiency.

277

278 In addition to the classical stem cell paradigm, our *in vivo* results reveal that SOX2<sup>+</sup> cells can promote  
279 turnover in a second way, through the secretion of paracrine ligands, and we identify WNT6 as a key  
280 ligand in this process. The paradigm of stem cells acting as signalling hubs to regulate proliferation of  
281 their neighbouring descendants was previously demonstrated in pituitary gland stem cells<sup>25</sup>, and  
282 further shown to underlie tumour formation<sup>20</sup>. It supports the possibility that adrenomedullary stem  
283 cells may contribute cell autonomously and cell non-autonomously to adrenal tumour pathogenesis.  
284 Since an established stem cell population had not been identified, the current dogma dictates the cell-  
285 of-origin of pheochromocytoma and the related paraganglioma tumours as being specialised  
286 neuroendocrine cells<sup>28</sup>. It can be postulated that this newly characterised stem cells may be involved  
287 in the initiation or progression of tumours, and our findings can support study of these processes and  
288 the generation of disease models.

289

290

## 291 **Acknowledgements**

292 We thank Professor Martin Fassnacht for support with human adrenal tissue, Professor Karen Liu and  
293 Dr William Barrell for support with CAM assays, the King's College London Biological Services facilities,  
294 the Advanced Cytometry Platform (Flow Core), Guy's and St. Thomas' NHS Trust and the Genomics  
295 Research Platform, R&D Department, Guy's and St. Thomas' NHS Trust. We thank Prof. Françoise  
296 Helmbacher and Dr Marika Charalambous for critical reading of the manuscript and insightful

297 comments.

298

### 299 **Author Contributions**

300 Conceptualisation, A.S., C.L.A.; Methodology, A.S., Y.K., C.L.A.; Software and Formal Analysis, A.S.,  
301 T.L.W., V.Y., L.F., I.A.; Investigation, A.S., Y.K., T.L.W., I.B., M.E.K., L.F., J.P.R., E.J.L.; Writing – Original  
302 Draft, A.S., Y.K., C.L.A.; Writing – Review & Editing, A.S., Y.K., T.L.W., I.B., M.E.K., L.F., J.P.R., E.J.L., V.Y.,  
303 R.J.O., P.A., S.R.B., C.S., I.A., C.L.A. Funding Acquisition, C.L.A., R.J.O., S.R.B., C.S.; Resources, B.A., I.A.;  
304 Supervision, R.J.O., S.R.B., C.S., I.A., C.L.A.

305

### 306 **Declaration of Interests**

307 A.S. and T.L.W. are currently employees of Altos Labs. V. Y. is currently employee of Bit.bio. I.B. is  
308 currently employee of Novartis. The remaining authors declare no competing interests.

309

### 310 **Ethics**

311 Studies using human adrenals were carried out under King's College London ethical approval with KCL  
312 Ethics Reference LRS-19/20-20118, as part of the adrenal tumour registry project of the European  
313 Network for Adrenal Tumours ENS@T (European Network for the Study of Adrenal Tumours). All  
314 animal studies were performed under compliance of the Animals (Scientific Procedures) Act 1986,  
315 Home Office Licences P5F0A1579 (mouse) and P8D5E2773 (chicken), as well as KCL Biological Safety  
316 approval for project 'Function and Regulation of Adrenal Stem Cells in Mammals'.

317

### 318 **Funding**

319 Medical Research Council (MR/T012153/1) to CLA, the Paradifference Foundation to CLA and RO, the  
320 Deutsche Forschungsgemeinschaft (DFG German Research Foundation) (Project Number 314061271  
321 – TRR 205) to CLA, SRB and CS.

322

323 **Figure legends**

324 Figure 1. Single-cell RNA sequencing of the mouse adrenal medulla. A) Experimental workflow. B)  
325 UMAP of adrenomedullary cell types (2708 cells). C) Heatmap showing the transcriptional signatures  
326 of 8 clusters (top 5 differentially expressed genes). D) Violin plots indicating expression of different  
327 markers to identify each cluster. E) UMAP showing the distribution of cell cycle states over the dataset.  
328 Computationally identified percentages of medullary cells in different cell cycle phases: 44.61% (1208  
329 cells) are in G1, 31.75% (859 cells) are in S, 23.67% (641 cells) in G2/M; F) Featureplots of known  
330 sustentacular cell and SCP markers *S100b*, *Plp1*, *Gfap*, *Sox10*, and of newly identified marker *Sox2*.  
331 Colour scale indicates expression level.

332

333 Figure 2. SOX2<sup>+</sup> cells are present in the adrenal medulla and are derived from Schwann Cell Precursors.  
334 A) Immunohistochemistry with antibodies against SOX2 (brown) at P15 and 365 in wild type adrenal  
335 medullae. Nuclei counterstained with Hematoxylin, scale bar 20µm. B) Quantification of SOX2<sup>+</sup> cells  
336 over the total nuclei of adrenal medulla. n = 6 animals for each timepoint, plotted mean and SEM.  
337 One-way ANOVA multiple comparisons test: P15 vs. P17 (*P*-value 0.0009); P15 vs. P21 (*P*-value  
338 0.9925); P15 vs. P28 (*P*-value 0.0386); P15 vs. P42 (*P*-value 0.0007); P15 vs. P84 (*P*-value 0.0003); P15  
339 vs. P178 (*P*-value 0.0006); P15 vs. P365 (*P*-value 0.0013). C) Immunofluorescence staining of P15  
340 *Sox2*<sup>eGFP/+</sup> adrenal medulla using antibodies against SOX10 (magenta) or S100β (magenta) and GFP  
341 (green), shows double-positive cells in both (arrowheads). Immunofluorescence staining of a P15 wild  
342 type (WT) sample using antibodies against GFAP (magenta) and SOX2 (green) shows double-positive  
343 cells (arrowheads). Nuclei counterstained with Hoechst, scale bars 10µm. D) RNAscope mRNA *in situ*  
344 hybridisation on wild type P15 samples shows double-positive cells for *S100b* (red) and *Sox2* (blue),  
345 *Gfap* (red) and *Sox2* (blue), *Sox10* (red) and *Sox2* (blue), *Plp1* (red) and *Sox2* (blue) respectively - (black  
346 arrowheads) or single positive (white arrowheads); all nuclei counterstained with Hematoxylin, scale  
347 bar 10µm. E) UMAP of the neural crest and SCP lineages between 9.5dpc - 12.5dpc from <sup>29</sup>. Trajectory  
348 of chromaffin cell (ChC) transitioning from the Hub cells. Featureplots showing expression of *Sox10*,

349 *Sox2*, *Chga*. *Sox10* expression precedes that of *Sox2* in this trajectory, which is maintained until  
350 expression of *Chga* marking chromaffin cells. F) Immunofluorescence on P15 mouse adrenals from  
351 *Wnt1<sup>Cre/+</sup>;R26<sup>mTmG/+</sup>* genotypes. Immunostaining with antibodies against SOX2 (magenta) and GFP  
352 (green) shows double-positive cells (arrowheads). Nuclei are counterstained with Hoechst, scale bars  
353 10 $\mu$ m. G) Immunofluorescence on P15 mouse adrenals from a *Sox10<sup>CreERT2/+</sup>;R26<sup>mTmG/+</sup>* line induced  
354 with tamoxifen (TMX) at 11.5dpc – immunostaining with antibodies against SOX2 (magenta) and GFP  
355 (green) shows double-positive cells (arrowheads). Nuclei counterstained with Hoechst, scale bars  
356 10 $\mu$ m.

357

358 Figure 3. Adrenomedullary SOX2<sup>+</sup> cells have stem cell properties *in vitro* and *in ovo*. A) Experimental  
359 workflow. B) Crystal violet staining of fixed cell colonies following 14 day culture of GFP<sup>+</sup> (SOX2<sup>+</sup>) and  
360 GFP<sup>-</sup> (SOX2<sup>-</sup>) *Sox2<sup>eGFP/+</sup>* cells under clonogenic conditions. C) Immunofluorescence staining of GFP<sup>+</sup>  
361 primary cells from *Sox2<sup>eGFP/+</sup>* medulla cultured for 14 days: GFP (green), SOX2 (red), nuclei stained with  
362 Hoechst, scale bar 50 $\mu$ m. D) Quantification of GFP<sup>+</sup> cells via flow cytometry after 14 days of culture,  
363 bar graph *n*=3 independent biological replicates. E) Experimental design of chick chorioallantoic  
364 membrane (CAM) assays for *ex vivo* 3D xenograft culture. F) Representative images of resulting  
365 xenograft before removal from CAM (left) and after isolation (right) following 18 days of incubation.  
366 Representative images of wholemount native EGFP expression in *Sox2<sup>eGFP/+</sup>*-derived xenograft  
367 (bottom). Scale bars 200 $\mu$ m G) Immunofluorescence staining using antibodies against TH (red) or  
368 PNMT (red) on xenografts at day 18. Nuclei counterstained with Hoechst. Scale bars 10 $\mu$ m.

369

370 Figure 4. Adrenomedullary SOX2<sup>+</sup> cells are stem cells *in vivo*. A) Experimental design indicating  
371 tamoxifen (TMX) induction at P14 and timepoints of collection and analysis. B) Immunofluorescence  
372 using antibodies against GFP, on *Sox2<sup>CreERT2/+</sup>;R26<sup>mTmG/+</sup>* adrenals induced with tamoxifen at P14 and  
373 collected after 72 hours or 178 days. GFP in green, nuclei counterstained with Hoechst. Inserts  
374 magnified boxed regions. Scale bar 100 $\mu$ m. C) Quantification of GFP<sup>+</sup> cells/total nuclei of adrenal

375 medulla at different timepoints.  $N=6$  animals for each timepoint, plotted mean and SEM. One-way  
376 ANOVA multiple comparisons test: 72hrs vs. 7 days ( $P$ -value 0.9999); 72hrs vs. 14 days ( $P$ -value  
377 0.2522); 72hrs vs. 28 days ( $P$ -value 0.1912); 72hrs vs. 70 days ( $P$ -value 0.0286); 72hrs vs. 178 days ( $P$ -  
378 value 0.0006). D) Double-immunofluorescence on  $Sox2^{CreERT2/+};R26^{mTmG/+}$  adrenals induced at P14 and  
379 collected after 178 days, using antibodies against GFP (green) and specific cell markers (magenta) TH  
380 (all chromaffin cells), PNMT (adrenaline chromaffin cells) or PENK (noradrenaline chromaffin cells).  
381 Note the presence of double-labelled cells (arrowheads). Nuclei counterstained with Hoechst (blue),  
382 scale bar  $10\mu\text{m}$ . E) Double-immunofluorescence on  $Sox2^{CreERT2/+};R26^{mTmG/+}$  mice induced at P189 (6  
383 months) and collected after 28 days, using antibodies against GFP (green) and TH (magenta). Note the  
384 presence of double-labelled cells (arrowheads). Nuclei counterstained with Hoechst (blue), scale bar  
385  $10\mu\text{m}$ .

386

387 Figure 5. SOX2+ adrenomedullary stem cells promote proliferation of chromaffin cells through  
388 secretion of paracrine WNT signals. A) Featureplots for expression of WNT targets *Lef1*, *Axin2* and *Lgr5*  
389 in the mouse postnatal adrenal medulla dataset, Key of clusters, grouping by lineage. B)  
390 Immunofluorescence using antibodies against TH (chromaffin cells) and GFP (cells that have  
391 responded to WNT) on mouse TCF/Lef:H2B-EGFP adrenal medulla at P21. Nuclei are counterstained  
392 with Hoechst, scale bars  $50\mu\text{m}$ . C) Dot plots of all *Wnt* genes expressed in the mouse adrenal medulla  
393 dataset (left) and in the isolated SOX2-EGFP<sup>+</sup> cell dataset (right), subdivided by cell clusters. D)  
394 RNAscope mRNA in situ hybridisation using probes against *Sox2* (red) and *Wnt6* (blue), showing co-  
395 expression. Image in right is magnified region (i). Scale bars  $20\mu\text{m}$ . E) Featureplots for *Wls* in the mouse  
396 adrenal medulla dataset (left) and in the isolated SOX2-EGFP<sup>+</sup> cell dataset. F) Representative  
397 immunofluorescence using antibodies against Ki-67 marking cycling cells in  $Sox2^{+/+};Wls^{fl/fl}$  (control,  
398 top) and  $Sox2^{CreERT2/+};Wls^{fl/fl}$  (mutant, bottom) samples following tamoxifen induction at P21 and  
399 analysis at P26 ( $n=8$  controls, 6 mutants). Nuclei counterstained with Hoechst, scale bars  $50\mu\text{m}$ . Graph  
400 showing percentage of Ki-67 positive cells across replicates, revealing a statistically significant

401 reduction in cycling cells in the mutant. Unpaired *t*-test, *P*-value = 0.0083.

402

### 403 **Supplementary Figures**

404

405 Figure S1. Single-cell RNA sequencing of the mouse adrenal medulla. A) UMAP of the entire  
406 postnatal medulla dataset obtained (9961 cells); B) Violin plots indicating expression markers chosen  
407 for downstream subsetting. C) QC for final dataset used. D) Featureplot for expression of *Xist*,  
408 indicating female cells in the dataset. E) Featureplots showing newly identified markers *Cox8b*, *Lix1*  
409 and *Penk*, specific to the noradrenaline-producing chromaffin cell cluster. F) Immunofluorescence  
410 with antibodies against PNMT or TH (magenta) and against PENK (green) on wild type P15 adrenals.  
411 Nuclei counterstained with Hoechst, scale bar 20µm. G) Immunohistochemistry on a human adrenal  
412 medulla (Female, 48 years of age) using antibodies against PENK (brown) confirming expression.  
413 Nuclei counterstained with Hematoxylin, Scale bar 200µm, inset 50µm. H) Featureplots showing  
414 newly identified markers of mouse sustentacular cells. I) Featureplots showing gene expression of  
415 *Sox2* or *Sox10* with differentiated cell markers *Th*, *Penk*, *Pnmt*. J) Monocle pseudotime UMAP,  
416 marker gene expression plotted on Monocle UMAP. Sust- sustentacular cells; Nor- Noradrenaline  
417 chromaffin lineage; Adr- Adrenaline chromaffin lineage; Cycling- cycling adrenaline chromaffin cells.

418

419 Figure S2. SOX2<sup>+</sup> cells are present in the mouse adrenal medulla and are derived from Schwann Cell  
420 Precursors. A) Quantification of SOX2<sup>+</sup> cells over the total nuclei of adrenal medulla, split by sex. n = 3  
421 animals per sex, per timepoint. Mean and SEM plotted. B) Immunohistochemistry with antibodies  
422 against SOX2 (brown) on normal human adrenals in females (at 17, 48 and 55 years of age) and males  
423 (at 29, 56, and 71 years of age). Nuclei counterstained with Hematoxylin, scale bar 20µm. C)  
424 Immunofluorescence on *Sox2*<sup>eGFP/+</sup> adrenal medulla at P15, using antibodies against GFP (green) and  
425 SOX2 (magenta) showing complete co-localisation (arrowheads). Nuclei counterstained with Hoechst,  
426 scale bars 10µm. D) Activity of the *Sox2* regulon in data from <sup>29</sup>, showing this is active in the early part

427 of the chromaffin cell trajectory (labelled). E) Top correlated genes to *Sox2*, irrespective of trajectory,  
428 which include several markers of the postnatal *Sox2*-expressing population. The highest expression is  
429 observed in satellite glia and Hub cells (red boxes). F) Featureplots of *Sox2*-correlated genes  
430 expression. G) Ranked correlation analysis identifying genes highest correlated with *Sox2* specifically  
431 in the chromaffin cell trajectory, and anti-correlated with *Sox2*, which includes chromaffin cell markers  
432 (*Th*, *Chga*, *Chgb*).

433

434 Figure S3. Adrenomedullary SOX2<sup>+</sup> stem cells are a distinct population from Schwann Cell Precursors.

435 A) Experimental design. Featureplot showing *Sox2* expression in the selected dataset. B) Gene  
436 ontology of differentially expressed genes by embryonic SCPs compared to postnatal *Sox2*-expressing  
437 cells. C) Gene ontology of differentially expressed genes by postnatal *Sox2*-expressing cells compared  
438 to embryonic SCPs. D) STRING analysis of the top 50 most differentially expressed genes by postnatal  
439 *Sox2*-expressing cells compared to embryonic SCPs.

440

441 Figure S4. Adrenomedullary SOX2<sup>+</sup> cells have stem cell properties. A) Experimental design. B)  
442 Brightfield images of cultured GFP<sup>+</sup> cells: 5, 7, 10, 14 days after isolation. Scale bars 200µm (5 days)  
443 and 500µm (7, 10, 14 days). C) Brightfield image of cultured GFP<sup>+</sup> cells after 1 passage, scale bar  
444 500µm. D) Immunofluorescence using antibodies against GFP (green) on sections from a  
445 *Sox2*<sup>+/+</sup>; *R26*<sup>mTmG/+</sup> adrenal at P42 (top panel) or *Sox2*<sup>CreERT2/+</sup>; *R26*<sup>mTmG/+</sup> adrenal from a mouse injected  
446 with corn oil P14 and collected after 28 days (P42, bottom panel). Note the absence of GFP-labelled  
447 cells in these controls. Nuclei counterstained with Hoechst (blue), scale bar 50µm.

448

449 Figure S5. SOX2<sup>+</sup> adrenomedullary stem cells promote proliferation of chromaffin cells through  
450 secretion of paracrine WNT signals. A) Featureplots for *Wnt3*, *Wnt4*, *Wnt5a*, *Wnt6*, and *Wnt16* in the  
451 mouse adrenal medulla dataset. B) Featureplots for *Wnt4*, *Wnt5a*, *Wnt6*, and *Wnt9a* in the isolated  
452 SOX2-EGFP<sup>+</sup> cell dataset.

453

454 **STAR Methods – Santambrogio *et al.***

455

456 Animals

457 Procedures were carried out in compliance with the Animals (Scientific Procedures) Act 1986, Home  
458 Office licence and King's College London ethical review approval. All mouse colonies were maintained  
459 under 12:12 hours light/dark cycle and fed *ad libitum*. All mouse lines used were previously described:  
460 *Sox2<sup>eGFP/+</sup>*<sup>21</sup>, *Sox2<sup>CreERT2/+</sup>*<sup>20</sup>, *Wnt1<sup>Cre/+</sup>*<sup>30</sup>, *Sox10<sup>iCreERT2/+</sup>*<sup>31</sup>, *R26<sup>mTmG/+</sup>*<sup>32</sup>. All mice were bred and maintained  
461 on mixed backgrounds and consistently backcrossed on CD1. For Cre recombination, Tamoxifen  
462 (Sigma, T5648) was injected intraperitoneally with a single dose of 0.15mg/g body weight in postnatal  
463 mice. Pregnant females were injected by a single intraperitoneal injection of tamoxifen, capped at  
464 1.5mg and one dose of Progesterone (Sigma P0130) at 0.75mg.

465

466 Human samples

467 Normal adrenal human tissue samples were obtained from the University Hospital Würzburg  
468 (Germany). Normal adrenal glands removed as part of tumour nephrectomy and proven to be  
469 histologically normal, showing no neoplastic tissue.

470

471 Fluorescent Activated Cell Sorting

472 Adrenal glands from *Sox2<sup>eGFP/+</sup>* mice were dissected and tissue was dissociated as described for primary  
473 cell culture. At the last step, cells were resuspended in FACS buffer (2.5% HEPES solution 1M (Sigma),  
474 1% FBS in PBS), passed through a 40µm cell strainer (Corning, CLS431750) and stained with DAPI  
475 0.05µg/ml (Biolegend, 422801), before being flow sorted by a FACSaria Cell Sorter (BD Biosciences).  
476 Adrenal medullae from wild type littermates were used as a negative control.

477

478 10x Single-cell RNA sequencing and computational analysis - postnatal adrenal medulla



479 10 adrenals from 5 mixed sex P15 mice were dissected on ice, surrounding fat and excess adrenal  
480 cortex were removed manually. Medullae were placed in an enzymatic digestion mix containing  
481 50µg/ml DNase I (Sigma, D5025), 10mg/ml Collagenase II (Worthington, LS004177), 2.5µg/ml  
482 Fungizone (Gibco, 15290026), 0.1X Trypsin-EDTA (Sigma, 59418C) in 1X Hank's Balanced Salt Solution  
483 (HBSS) (Gibco, 14025050) and incubated at 37°C for 15 minutes. Enzymes were inactivated by addition  
484 of 10 times volume of serum-containing Base Media: DMEM/F-12 (Gibco, 31330-038) + 5% FBS (Merk,  
485 F0804) + 50U/ml Penicillin-Streptomycin (Gibco, 15070063). The cell suspension was centrifuged at  
486 281g for 5 minutes at room temperature, washed twice in PBS and pellets were resuspended in a  
487 solution of HBSS 2.5% FBS. An aliquot of 10,000 viable cells were used for the experiment. Library  
488 preparation and sequencing were performed by the BRC Genomics Core at KCL. Library preparation  
489 was done using the Chromium 10X Single-cell 3' Reagent Kit v3.1 (10x Genomics, PN-1000121) and a  
490 Chromium Controller (10x Genomics) following the manufacturer's protocol. Once obtained,  
491 barcoded transcripts from single cells were sequenced with an Illumina HiSeq 2500.

492 Pre-processing of the sequencing datasets was performed by the BRC Genomics Core at KCL using Cell  
493 Ranger-4.0.0. Once feature-barcode matrices were obtained, analysis was performed in RStudio with  
494 the Seurat package, v3 and 4<sup>36,37</sup>, following author instructions. The dataset was subset to exclude  
495 cells with <500 or >5000 genes or with >20% mitochondrial genes. After normalisation, the 2000 most  
496 variable features were identified, the dataset was scaled and PCA was estimated based on the  
497 previously identified variable features. A UMAP was generated using the top 10 PCs and a resolution  
498 of 0.4. Cluster identities were assigned based on markers from the literature, gene counts from  
499 clusters showing medulla-specific markers were extracted and the matrix re-analysed with the same  
500 parameters. Cell cycle analysis was performed using the CellCycleScoring function in Seurat, following  
501 author specifications. Pseudotime analysis was performed using Monocle<sup>33</sup>, following author  
502 instructions.

503

504 10x Single-cell RNA sequencing and computational analysis - postnatal SOX2-EGFP<sup>+</sup> cells

505 30 adrenals from 15 mixed sex P15 *Sox2*<sup>2eGFP/+</sup> mice were dissected on ice, dissociated, and GFP+ cells  
506 were isolated via FACS, centrifuged at 300g for 5 minutes and resuspended in a solution of HBSS 2.5%  
507 FBS. 2,000 viable cells were used for the experiment. Droplet-based single-cell RNA sequencing was  
508 performed as described. Cells with <1000 or >5000 genes or with >20% mitochondrial genes were  
509 excluded. After normalisation, the 2000 most variable features were identified, the dataset was scaled  
510 and PCA was estimated based on the previously identified variable features. A UMAP was generated  
511 using the top 10 PCs and a resolution of 0.4. To further select only *Sox2* expressing cells, the WhichCell  
512 function was used to select only cells with *Sox2* normalised expression >1. Once extracting the raw  
513 counts from these cells, the dataset was reanalysed with the same parameters.

514

515 Differential expression analysis of SCPs vs *Sox2* expressing postnatal cells

516 SCPs were isolated from a 13.5dpc dataset<sup>15</sup> using the parameters described in the paper. This dataset  
517 was combined with the *Sox2* expressing cells dataset using Seurat integration PCs 1:30 and 2000  
518 variable features. Differential expression analysis between SCPs and postnatal *Sox2* expressing cells  
519 was performed following Seurat guidelines. [https://www.zotero.org/google-](https://www.zotero.org/google-docs/?XvRWI5)  
520 [docs/?XvRWI5](https://www.zotero.org/google-docs/?XvRWI5) ClusterProfiler<sup>34</sup> was used to obtain significantly differentially expressed gene  
521 ontologies. STRING <https://www.zotero.org/google-docs/?tmJnpd> analysis<sup>35</sup> of the 50 top  
522 differentially expressed genes in the postnatal dataset was used to reveal connections.

523

524 Correlation analysis of *Sox2* regulon

525 Data published <https://www.zotero.org/google-docs/?nqcKLj> by<sup>29</sup> were utilised. This dataset included  
526 the processed transcriptomic data as well as the SCENIC-related dataset. The Spearman correlation  
527 between the activity score of the *Sox2*(+) regulon and the log<sub>10</sub> expression of gene transcripts in all  
528 processed cells was calculated. Expression values of top correlated and anti-correlated genes were  
529 also represented by fitting these with Generalized-Additive model (GAM), using the pseudotime  
530 assignments of the cells of the trajectory from late NCC/SCP to ChC. Pseudotime and trajectory

531 representation and analysis were carried out using scFates package.

532

533 Tissue processing

534 For paraffin-embedding, adrenal glands were dissected, surrounding fat was removed and samples  
535 were fixed in 10% neutral buffered formalin (NBF) (Sigma, HT501128) overnight at room temperature.

536 Grafts collected from the chorioallantoic membranes (CAM) were dissected and fixed following the  
537 same protocol. The next day, tissue was washed and dehydrated through graded ethanol series and  
538 paraffin-embedded. Samples were sectioned at 5 $\mu$ m thickness. For cryo-embedding, adrenal glands  
539 were dissected, surrounding fat removed and samples fixed in 4% PFA at 4°C for 4 hours. Adrenals  
540 were washed and cryoprotected in 30% Sucrose overnight at 4°C. Adrenals were embedded in Optical  
541 Cutting Temperature (OCT) compound (VWR, 361603E) and flash-frozen. Samples were cryo-  
542 sectioned at 8-12 $\mu$ m thickness.

543

544 Immunofluorescence and immunohistochemistry on paraffin sections

545 Paraffin sections were deparaffinised and rehydrated with ethanol series. Antigen retrieval was  
546 performed in a Decloaking Chamber NXGEN (Menarini Diagnostics, DC2012-220V) at 110°C for 3  
547 minutes using Declere, pH 6.0 (Cell Marque, 921P-04) for immunohistochemistry or Dako Target  
548 Retrieval Solution, pH 9.0 (Agilent, S236784-2) for immunofluorescence.

549 For immunohistochemistry, ImmPRESS Excel Amplified HRP Polymer Staining Kit Anti-Rabbit IgG  
550 (Vector Laboratories, MP-7602-50) was used following the manufacturer's instructions. Primary  
551 antibodies were used at the concentrations listed in STAR Methods Resource Table. Nuclei were  
552 stained with Vector Hematoxylin QS (Vector Laboratories, H-3404-100) and slides were mounted in  
553 VectaMount Permanent Mounting Medium (Vector Laboratories, H-5000-60).

554 For immunofluorescence, sections were blocked for 1 hour at room temperature in Blocking Buffer  
555 (0.15% glycine, 2mg/ml BSA, 0.1% Triton X-100 in PBS) with 10% sheep serum. Primary antibodies  
556 were diluted in Blocking Buffer with 1% sheep serum at the concentrations described in STAR Methods

557 Resource Table and incubated overnight at 4°C. After washing 3 times with PBST (PBS + 0.1% Triton X-  
558 100), samples were incubated for 1 hour at room temperature in secondary fluorophore-conjugated  
559 antibodies (dilution 1:500, listed in STAR Methods Resource Table) and Hoechst (Life Technologies,  
560 H3570) (dilution 1:10,000) in blocking buffer with 1% serum. Tyrosine Hydroxylase and PNMT  
561 antibodies were amplified with biotin-streptavidin by incubating at room temperature for 1 hour with  
562 anti-mouse biotinylated secondary antibody (dilution 1:300, listed in STAR Methods Resource Table)  
563 and Hoechst (Life Technologies, H3570) (dilution 1:10,000), washed 3 times with PBST and incubated  
564 at room temperature for 1 hour with fluorescent-labelled streptavidin (dilution 1:500, listed in STAR  
565 Methods Resource Table). After washing in PBST, slides were mounted with Vectashield Antifade  
566 Mounting Medium (Vector Laboratories, H-1000-10).

567

568 Immunofluorescence on cryosections

569 Sections were blocked for 1 hour at room temperature in Blocking Buffer (1% BSA, 0.1% Triton X-100,  
570 5% goat serum). Primary antibodies were diluted in Blocking Buffer at the concentrations reported in  
571 STAR Methods Resource Table and incubated overnight at 4°C. After washing 3 times with PBS,  
572 secondary fluorophore-conjugated antibodies (dilution 1:500, listed in STAR Methods Resource Table)  
573 and Hoechst (Life Technologies, H3570) (dilution 1:10,000) were diluted in in Blocking Buffer and  
574 incubated for 1 hour at room temperature. After washing 3 times with PBS, slides were mounted with  
575 Vectashield Antifade Mounting Medium (Vector Laboratories, H-1000-10).

576

577 RNAscope mRNA *in situ* hybridisation

578 RNAscope was performed on paraffin-embedded sections with the RNAscope 2.5 HD Duplex Kit (ACD  
579 Bio, 322430) following the manufacturer's protocol, with optimised retrieval time of 12 minutes and  
580 protease time of 30 minutes. Probes used are listed in STAR Methods Resource Table. Sections were  
581 counterstained with Hematoxylin QS (Vector Laboratories, H-3404-100) and slides were mounted in  
582 VectaMount Permanent Mounting Medium (Vector Laboratories, H-5000-60).

583

584 Primary cell culture

585 Adrenal glands were dissected, and the medulla isolated manually. Medullae were placed in an  
586 enzymatic digestion mix containing 50µg/ml DNase I (Sigma, D5025), 10mg/ml Collagenase II  
587 (Worthington, LS004177), 2.5µg/ml Fungizone (Gibco, 15290026), 0.1X Trypsin-EDTA (Sigma, 59418C)  
588 in 1X Hank's Balanced Salt Solution (HBSS) (Gibco, 14025050). Medullae in enzymatic digestion mix  
589 were incubated at 37°C for 10 minutes, triturated by pipetting up and down and incubated for 5  
590 minutes at 37°C, followed by trituration to obtain a single-cell suspension. Enzymes were inactivated  
591 by addition of 10 times volume of serum-containing Base Media: DMEM/F-12 (Gibco, 31330-038) +  
592 5% FBS (Merk, F0804) + 50U/ml Penicillin-Streptomycin (Gibco, 15070063). The cell suspension was  
593 centrifuged at 300g for 5 minutes at room temperature, washed twice in PBS before being  
594 resuspended in Complete Media: Base Media + 20ng/ml bFGF (R&D Systems, 234-FSE) + 50µg/ml  
595 cholera toxin (Sigma, C8052). Two days after isolation, an equal volume of fresh media was added to  
596 each plate. Media was fully changed every 2-3 days. For immunostaining, cells were plated on glass  
597 coverslips coated with 0.1% gelatine diluted in PBS.

598

599 Colony Forming Assay

600 For colony forming assays, adrenals from *Sox2<sup>eGFP/+</sup>* mice were dissected and tissue was dissociated as  
601 described for primary cell culture. GFP<sup>+</sup> and GFP<sup>-</sup> cells were separated by flow sorting. After sorting,  
602 GFP<sup>+</sup> and GFP<sup>-</sup> cells were plated at clonal density of 500 cells/well in a 12-well plate. Two days after  
603 isolation, an equal volume of medium to the one present in the plate was added. After that, media  
604 were changed every 2-3 days.

605 After 14 days of culture, cells were washed 3 times in PBS and fixed with 10% NBF for 10 minutes at  
606 room temperature. After washing 3 times with PBS, cells were stained for 10 minutes with Crystal  
607 Violet Solution: 0.5% Crystal Violet powder (Sigma, C0775), 20% methanol in distilled water. Excess  
608 crystal violet was washed with running tap water and plates dried before colony observation and

609 imaging.

610

611 Chorioallantoic Membrane (CAM) assays

612 Fertilised Shaver Brown eggs were purchased from Medeggs Ltd and placed in an egg incubator set at  
613 37.8°C/60% humidity. This is considered developmental day 0. On day 4, the CAM was exposed using  
614 curved spring scissors and the window sealed with clear tape to prevent contamination and placed  
615 back in the incubator. On day 10 of incubation, a silicone ring of 6mm diameter was placed onto the  
616 CAM of each egg.  $8 \times 10^5$  isolated *Sox2<sup>eGFP</sup>* cells were seeded within the silicone ring. The window was  
617 sealed again and the eggs placed in the incubator until graft collection at day 18.

618

619 Immunofluorescence on cells

620 For immunofluorescence on cells, coverslips were washed twice in PBS and fixed with 4% PFA on ice  
621 for 10 minutes. After washing with PBST, cells were blocked for 1 hour at room temperature in  
622 Blocking Buffer (0.15% glycine, 2mg/ml BSA, 0.1% Triton X-100 in PBS) with 10% sheep serum. Primary  
623 antibodies were incubated overnight at 4°C in Blocking Buffer with 1% sheep serum at the  
624 concentrations shown in the STAR Methods Resource Table. After washing with PBST, sections were  
625 incubated for 1 hour at room temperature in secondary fluorophore-conjugated antibodies, diluted  
626 1:500 (listed in STAR Methods Resource Table) in Blocking Buffer with 1% serum. After washing with  
627 PBST, coverslips were mounted with Vectashield HardSet Antifade Mounting Medium with DAPI  
628 (Vector Laboratories, H-1500-10)

629

630 Imaging

631 Images of immunofluorescence staining were taken with a Leica TCS SP5 or a Zeiss LSM980 confocal  
632 microscope, using an HCX Plan-Apochromat CS 20x/0.7 dry objective and an HCX Plan-Apochromat CS  
633 63x/1.3 Glycine objective (both Leica Microsystems), or Zeiss Plan-Apochromat 20x/0.8 dry objective,  
634 a Zeiss C-Apochromat 40x/1.2 Water objective and a Zeiss Plan-Apochromat 63x/1.40 Oil objective.

635 Stacks of 0.5 $\mu$ m/0.7 $\mu$ m were taken through the entire section thickness. Immunohistochemistry and  
636 RNAscope stained sections were scanned with a Nanozoomer-XR Digital slide scanner (Hamamatsu),  
637 close-up images were taken with an Olympus BX34F Brightfield microscope using a 40X objective. Cell  
638 culture images were taken with an Olympus Phase Contrast microscope using a 4X or 20X objective.  
639 Images were processed with Fiji (Schindelin et al., 2012) and with Nanozoomer Digital Pathology View.  
640 Figures were created in Adobe Illustrator.

641

642 Quantifications and statistics

643 Cell counting was performed manually with Fiji's "Cell Counter" plugin. For mouse samples, a  
644 minimum of three sections per sample were counted. For human samples, 5 representative fields  
645 were selected at 20X magnification for each sample and counted. Statistical analysis and graphs  
646 (except for single-cell RNA sequencing analysis) were produced using GraphPad Prism.

647

648 Code and data availability

649 Code is available at: [https://github.com/Andoniadou-Lab/adrenal\\_stemcell](https://github.com/Andoniadou-Lab/adrenal_stemcell)

650 Datasets are available at the Gene Expression Omnibus (GEO) with accession number GSE237125.

651

652

653

654

## 655 **References**

656

- 657 1. Kvetnansky, R., Sabban, E.L., and Palkovits, M. (2009). Catecholaminergic systems in stress:  
658 structural and molecular genetic approaches. *Physiol. Rev.* 89, 535–606.  
659 [10.1152/physrev.00042.2006](https://doi.org/10.1152/physrev.00042.2006).
- 660 2. Kvetnansky, R., Lu, X., and Ziegler, M.G. (2013). Stress-triggered changes in peripheral  
661 catecholaminergic systems. *Adv. Pharmacol. San Diego Calif* 68, 359–397. [10.1016/B978-0-12-411512-5.00017-8](https://doi.org/10.1016/B978-0-12-411512-5.00017-8).
- 662 3. Bechmann, N., Berger, I., Bornstein, S.R., and Steenblock, C. (2021). Adrenal medulla  
663 development and medullary-cortical interactions. *Mol. Cell. Endocrinol.* 528, 111258.  
664 [10.1016/j.mce.2021.111258](https://doi.org/10.1016/j.mce.2021.111258).
- 665 4. Kim, M.S., Ryabets-Lienhard, A., Bali, B., Lane, C.J., Park, A.H., Hall, S., and Geffner, M.E. (2014).
- 666



- 667 Decreased adrenomedullary function in infants with classical congenital adrenal hyperplasia. *J.*  
668 *Clin. Endocrinol. Metab.* *99*, E1597-1601. 10.1210/jc.2014-1274.
- 669 5. Lenders, J.W.M., Eisenhofer, G., Mannelli, M., and Pacak, K. (2005). Pheochromocytoma.  
670 *Lancet Lond. Engl.* *366*, 665–675. 10.1016/S0140-6736(05)67139-5.
- 671 6. Bedoya-Reina, O.C., Li, W., Arceo, M., Plescher, M., Bullova, P., Pui, H., Kaucka, M., Kharchenko,  
672 P., Martinsson, T., Holmberg, J., et al. (2021). Single-nuclei transcriptomes from human adrenal  
673 gland reveal distinct cellular identities of low and high-risk neuroblastoma tumors. *Nat.*  
674 *Commun.* *2021* *121* *12*, 1–15. 10.1038/s41467-021-24870-7.
- 675 7. Hanemaaijer, E.S., Margaritis, T., Sanders, K., Bos, F.L., Candelli, T., Al-Saati, H., van Noesel,  
676 M.M., Meyer-Wentrup, F.A.G., van de Wetering, M., Holstege, F.C.P., et al. (2021). Single-cell  
677 atlas of developing murine adrenal gland reveals relation of Schwann cell precursor signature to  
678 neuroblastoma phenotype. *Proc. Natl. Acad. Sci. U. S. A.* *118*. 10.1073/pnas.2022350118.
- 679 8. Lopez, J.P., Brivio, E., Santambrogio, A., Donno, C.D., Kos, A., Peters, M., Rost, N., Czamara, D.,  
680 Brückl, T.M., Roeh, S., et al. (2021). Single-cell molecular profiling of all three components of the  
681 HPA axis reveals adrenal ABCB1 as a regulator of stress adaptation. *Sci. Adv.* *7*, eabe4497.  
682 10.1126/SCIADV.ABE4497.
- 683 9. Chung, K.F., Sicard, F., Vukicevic, V., Hermann, A., Storch, A., Huttner, W.B., Bornstein, S.R., and  
684 Ehrhart-Bornstein, M. (2009). Isolation of neural crest derived chromaffin progenitors from  
685 adult adrenal medulla. *Stem Cells* *27*, 2602–2613. 10.1002/stem.180.
- 686 10. Rubin De Celis, M.F., Garcia-Martin, R., Wittig, D., Valencia, G.D., Enikolopov, G., Funk, R.H.,  
687 Chavakis, T., Bornstein, S.R., Androutsellis-Theotokis, A., and Ehrhart-Bornstein, M. (2015).  
688 Multipotent glia-like stem cells mediate stress adaptation. *Stem Cells* *33*, 2037–2051.  
689 10.1002/stem.2002.
- 690 11. Santana, M.M., Chung, K.-F., Vukicevic, V., Rosmaninho-Salgado, J., Kanczkowski, W., Cortez, V.,  
691 Hackmann, K., Bastos, C.A., Mota, A., Schrock, E., et al. (2012). Isolation, Characterization, and  
692 Differentiation of Progenitor Cells from Human Adult Adrenal Medulla. *STEM CELLS Transl. Med.*  
693 *1*, 783–791. 10.5966/sctm.2012-0022.
- 694 12. Tischler, A.S., Ruzicka, L.A., Donahue, S.R., and DeLellis, R.A. (1989). Chromaffin cell proliferation  
695 in the adult rat adrenal medulla. *Int. J. Dev. Neurosci.* *7*, 439–448. 10.1016/0736-  
696 5748(89)90004-X.
- 697 13. Verhofstad, A.A. (1993). Kinetics of adrenal medullary cells. *J. Anat.* *183* ( Pt 2, 315–326.
- 698 14. Furlan, A., Dyachuk, V., Kastriti, M.E., Calvo-Enrique, L., Abdo, H., Hadjab, S., Chontorotzea, T.,  
699 Akkuratova, N., Usoskin, D., Kamenev, D., et al. (2017). Multipotent peripheral glial cells  
700 generate neuroendocrine cells of the adrenal medulla. *Science* *357*, eaal3753.  
701 10.1126/science.aal3753.
- 702 15. Kameneva, P., Artemov, A.V., Kastriti, M.E., Faure, L., Olsen, T.K., Otte, J., Erickson, A., Semsch,  
703 B., Andersson, E.R., Ratz, M., et al. (2021). Single-cell transcriptomics of human embryos  
704 identifies multiple sympathoblast lineages with potential implications for neuroblastoma origin.  
705 *Nat. Genet.* *53*, 694–706. 10.1038/s41588-021-00818-x.
- 706 16. Lumb, R., Tata, M., Xu, X., Joyce, A., Marchant, C., Harvey, N., Ruhrberg, C., and Schwarz, Q.  
707 (2018). Neuropilins guide preganglionic sympathetic axons and chromaffin cell precursors to  
708 establish the adrenal medulla. *Development* *145*, dev.162552. 10.1242/dev.162552.
- 709 17. Bielohuby, M., Herbach, N., Maser-gluth, C., Beuschlein, F., Wolf, E., and Hoeflich, A. (2007).  
710 Growth analysis of the mouse adrenal gland from weaning to adulthood: time- and gender-  
711 dependent alterations of cell size and number in the cortical compartment. *Am J Physiol*  
712 *Endocrinol Metab* *293* *293*, E139–E146. 10.1152/ajpendo.00705.2006.
- 713 18. Viveros, O.H., Diliberto, E.J., Hazum, E., and Chang, K.J. (1979). Opiate-like materials in the  
714 adrenal medulla: Evidence for storage and secretion with catecholamines. *Mol. Pharmacol.* *16*,  
715 1101–1108.
- 716 19. Takahashi, M., and Osumi, N. (2005). Identification of a novel type II classical cadherin: Rat  
717 cadherin19 is expressed in the cranial ganglia and Schwann cell precursors during development.



- 718 Dev. Dyn. 232, 200–208. 10.1002/dvdy.20209.
- 719 20. Andoniadou, C.L., Matsushima, D., Neda, S., Gharavy, M., Signore, M., Mackintosh, A.I.,  
720 Schaeffer, M., Gaston-Massuet, C., Mollard, P., Jacques, T.S., et al. (2013). Sox2+  
721 stem/progenitor cells in the adult mouse pituitary support organ homeostasis and have tumor-  
722 inducing potential. *Cell Stem Cell* 13, 433–445. 10.1016/j.stem.2013.07.004.
- 723 21. Ellis, P., Fagan, B.M., Magness, S.T., Hutton, S., Taranova, O., Hayashi, S., McMahon, A., Rao, M.,  
724 and Pevny, L. (2004). SOX2, a persistent marker for multipotential neural stem cells derived from  
725 embryonic stem cells, the embryo or the adult. *Dev. Neurosci.* 26, 148–165.  
726 10.1159/000082134.
- 727 22. Emmerson, E., May, A.J., Nathan, S., Cruz-Pacheco, N., Lizama, C.O., Maliskova, L., Zovein, A.C.,  
728 Shen, Y., Muench, M.O., and Knox, S.M. (2017). SOX2 regulates acinar cell development in the  
729 salivary gland. *eLife* 6. 10.7554/eLife.26620.
- 730 23. Que, J., Luo, X., Schwartz, R.J., and Hogan, B.L.M. (2009). Multiple roles for Sox2 in the  
731 developing and adult mouse trachea. *Development* 136, 1899 LP – 1907. 10.1242/dev.034629.
- 732 24. Auerbach, R., Kubai, L., Knighton, D., and Folkman, J. (1974). A simple procedure for the long-  
733 term cultivation of chicken embryos. *Dev. Biol.* 41, 391–394. 10.1016/0012-1606(74)90316-9.
- 734 25. Russell JP, Lim X, Santambrogio A, Yianni V, Kemkem Y, Wang B, Fish M, Haston S, Grabek A,  
735 Hallang S, Lodge EJ, Patist AL, Schedl A, Mollard P, Nusse R, Andoniadou CL. (2021). Pituitary  
736 stem cells produce paracrine WNT signals to control the expansion of their descendant  
737 progenitor cells. *elife*. 5. 10.7554/eLife.59142.
- 738 26. François, A., Low, S.A., Sypek, E.I., Christensen, A.J., Sotoudeh, C., Beier, K.T., Ramakrishnan, C.,  
739 Ritola, K.D., Sharif-Naeini, R., Deisseroth, K., et al. (2017). A Brainstem-Spinal Cord Inhibitory  
740 Circuit for Mechanical Pain Modulation by GABA and Enkephalins. *Neuron* 93, 822-839.e6.  
741 10.1016/j.neuron.2017.01.008.
- 742 27. Kastriti, M.E., Kameneva, P., and Adameyko, I. (2020). Stem cells, evolutionary aspects and  
743 pathology of the adrenal medulla: A new developmental paradigm. *Mol. Cell. Endocrinol.* 518,  
744 110998. 10.1016/J.MCE.2020.110998.  
745 11. 10.3389/fendo.2020.00079.
- 746 28. Scriba, L.D., Bornstein, S.R., Santambrogio, A., Mueller, G., Huebner, A., Hauer, J., Schedl, A.,  
747 Wielockx, B., Eisenhofer, G., Andoniadou, C.L., et al. (2020). Cancer Stem Cells in  
748 Pheochromocytoma and Paraganglioma. *Front. Endocrinol.* 11. 10.3389/fendo.2020.00079.
- 749 29. Kastriti, M.E., Faure, L., Von Ahsen, D., Boudierlique, T.G., Boström, J., Solovieva, T., Jackson, C.,  
750 Bronner, M., Meijer, D., Hadjab, S., et al. (2022). Schwann cell precursors represent a neural  
751 crest-like state with biased multipotency. *EMBO J.* 41, e108780. 10.15252/embj.2021108780.
- 752 30. Danielian, P.S., Muccino, D., Rowitch, D.H., Michael, S.K., and McMahon, A.P. (1998).  
753 Modification of gene activity in mouse embryos in utero by a tamoxifen-inducible form of Cre  
754 recombinase. *Curr. Biol. CB.*
- 755 31. Laranjeira, C., Sandgren, K., Kessar, N., Richardson, W., Potocnik, A., Vanden Berghe, P., and  
756 Pachnis, V. (2011). Glial cells in the mouse enteric nervous system can undergo neurogenesis in  
757 response to injury. *J. Clin. Invest.* 121, 3412–3424. 10.1172/JCI58200.
- 758 32. Muzumdar, M.D., Tasic, B., Miyamichi, K., Li, L., and Luo, L. (2007). A Global Double-Fluorescent  
759 Cre Reporter Mouse. *genesis* 45, 593–605. 10.1002/dvg.
- 760 33. Trapnell, C., Cacchiarelli, D., Grimsby, J., Pokharel, P., Li, S., Morse, M., Lennon, N.J., Livak, K.J.,  
761 Mikkelsen, T.S., and Rinn, J.L. (2014). The dynamics and regulators of cell fate decisions are  
762 revealed by pseudotemporal ordering of single cells. *Nat. Biotechnol.* 32, 381–386.  
763 10.1038/nbt.2859.
- 764 34. Wu, T., Hu, E., Xu, S., Chen, M., Guo, P., Dai, Z., Feng, T., Zhou, L., Tang, W., Zhan, L., et al.  
765 (2021). clusterProfiler 4.0: A universal enrichment tool for interpreting omics data. *The*  
766 *Innovation* 2. 10.1016/j.xinn.2021.100141.
- 767 35. Szklarczyk, D., Franceschini, A., Wyder, S., Forslund, K., Heller, D., Huerta-Cepas, J., Simonovic,  
768 M., Roth, A., Santos, A., Tsafou, K.P., et al. (2015). STRING v10: protein-protein interaction

- 769 networks, integrated over the tree of life. *Nucleic Acids Res.* *43*, D447-452.  
770 [10.1093/nar/gku1003](https://doi.org/10.1093/nar/gku1003).
- 771 36. Hao, Y., Hao, S., Andersen-Nissen, E., Mauck, W.M., Zheng, S., Butler, A., Lee, M.J., Wilk, A.J.,  
772 Darby, C., Zager, M., et al. (2021). Integrated analysis of multimodal single-cell data. *Cell* *184*,  
773 3573-3587.e29. [10.1016/J.CELL.2021.04.048](https://doi.org/10.1016/J.CELL.2021.04.048).
- 774 37. Stuart, T., Butler, A., Hoffman, P., Hafemeister, C., Papalexi, E., Mauck, W.M., Hao, Y., Stoeckius,  
775 M., Smibert, P., and Satija, R. (2019). Comprehensive Integration of Single-Cell Data. *Cell* *177*,  
776 1888-1902.e21. [10.1016/J.CELL.2019.05.031](https://doi.org/10.1016/J.CELL.2019.05.031).

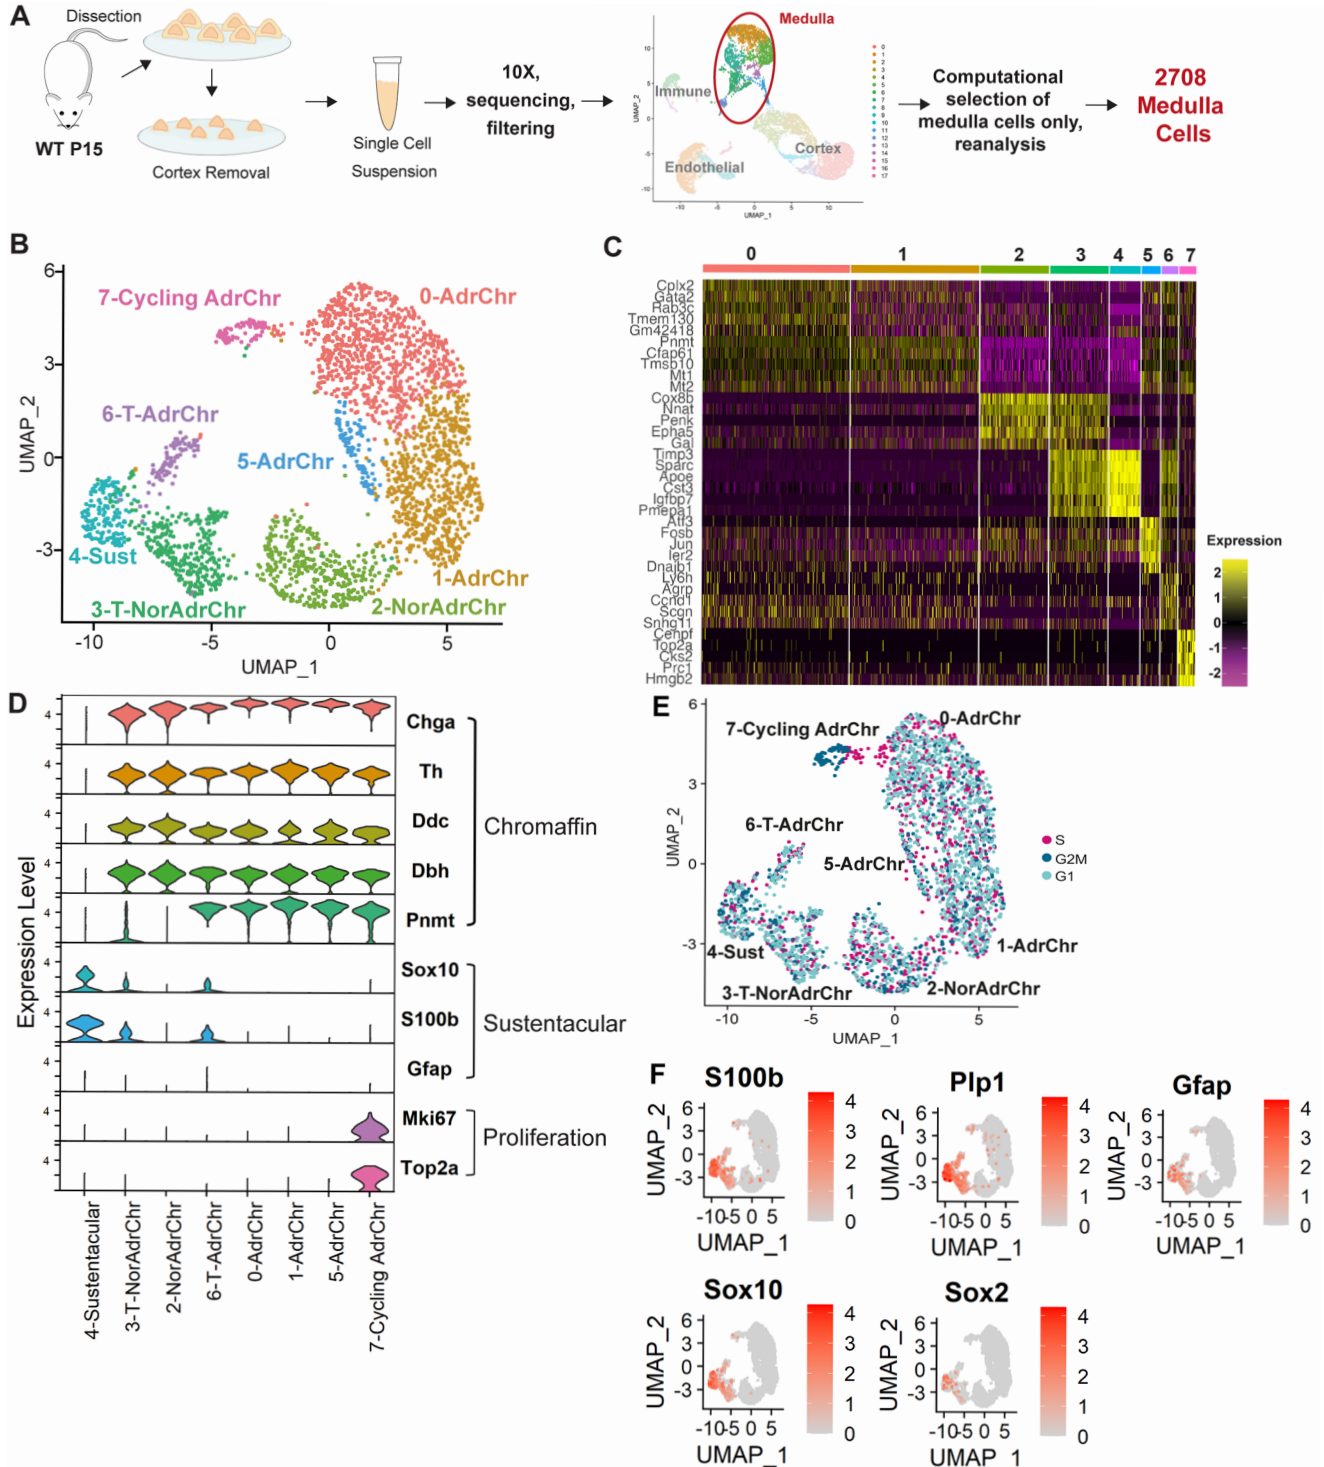

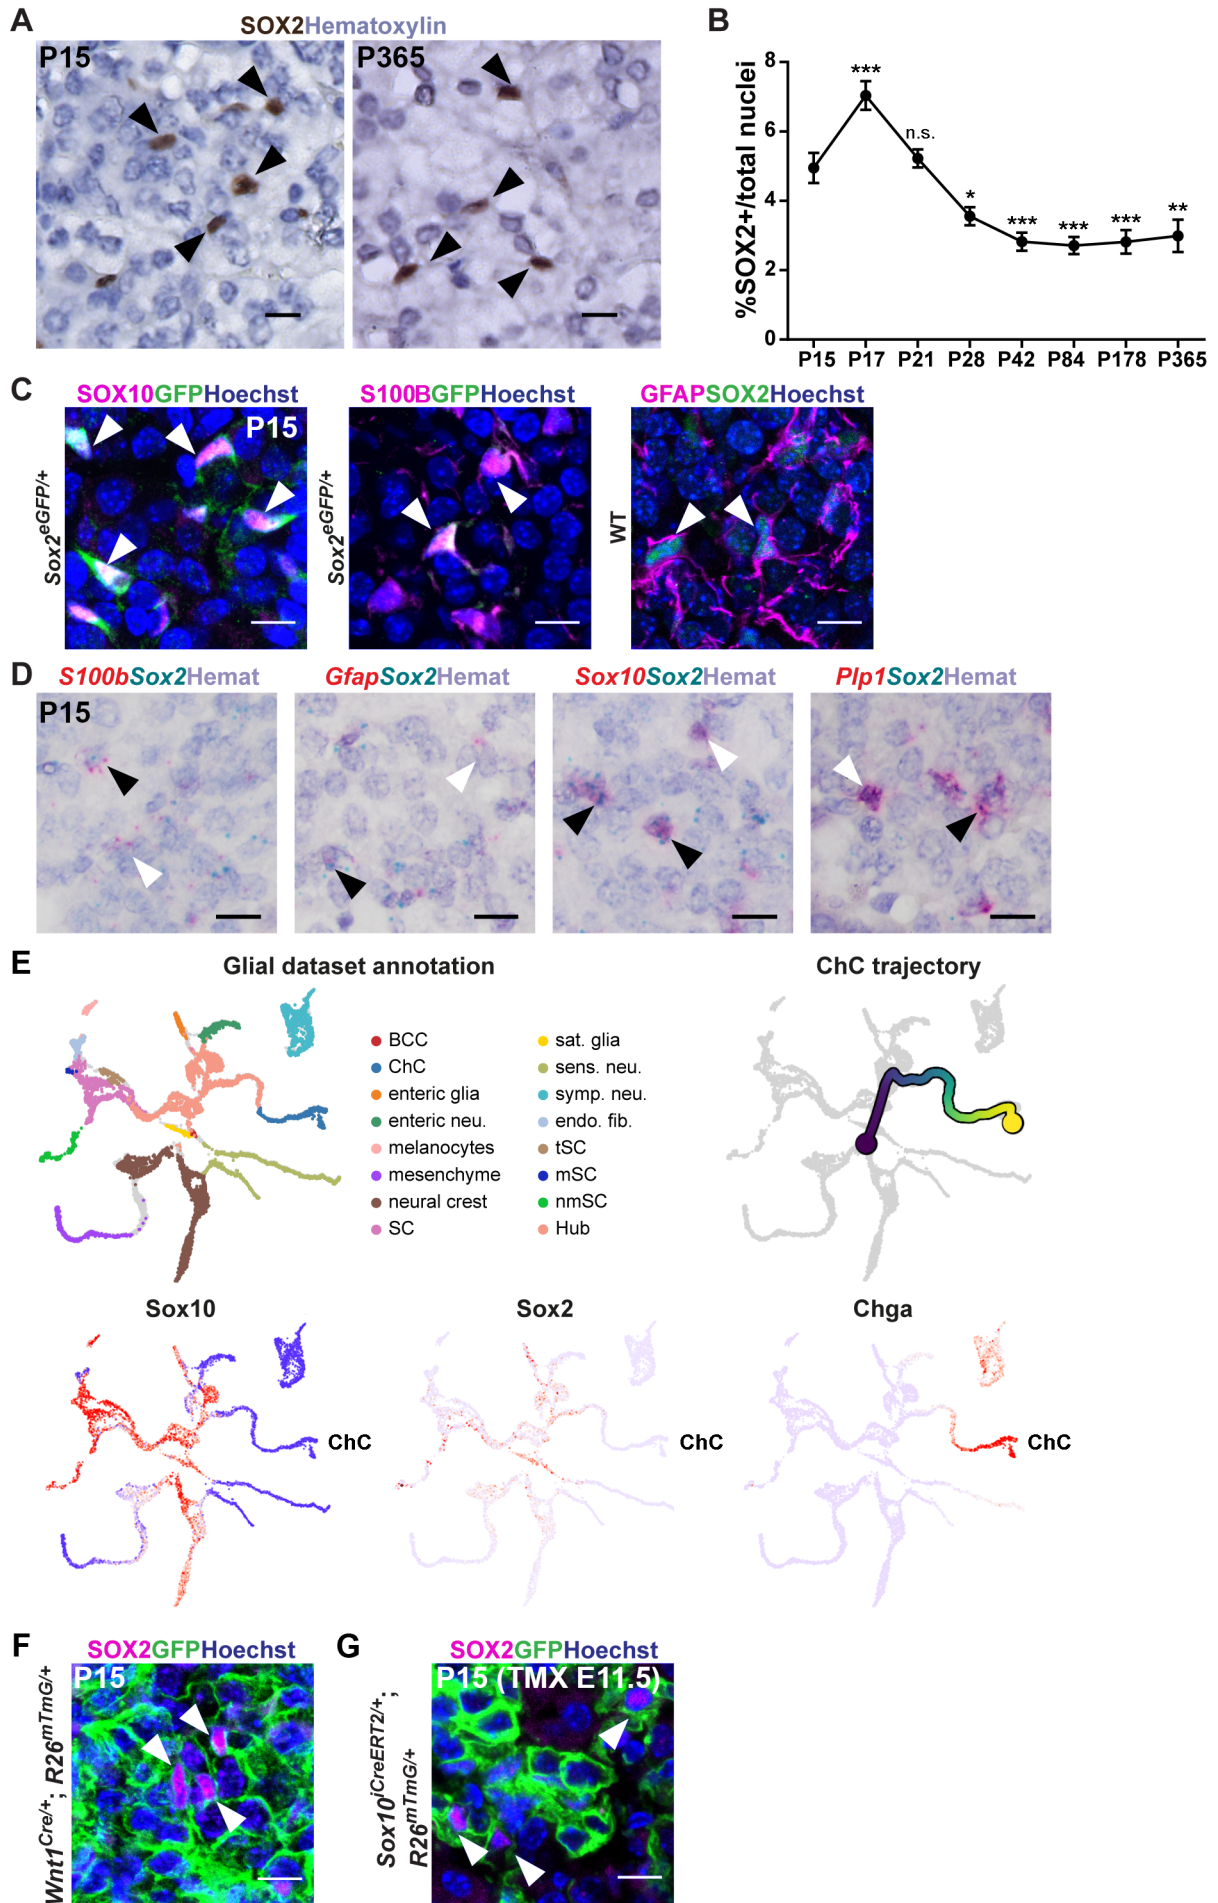



Figure 3

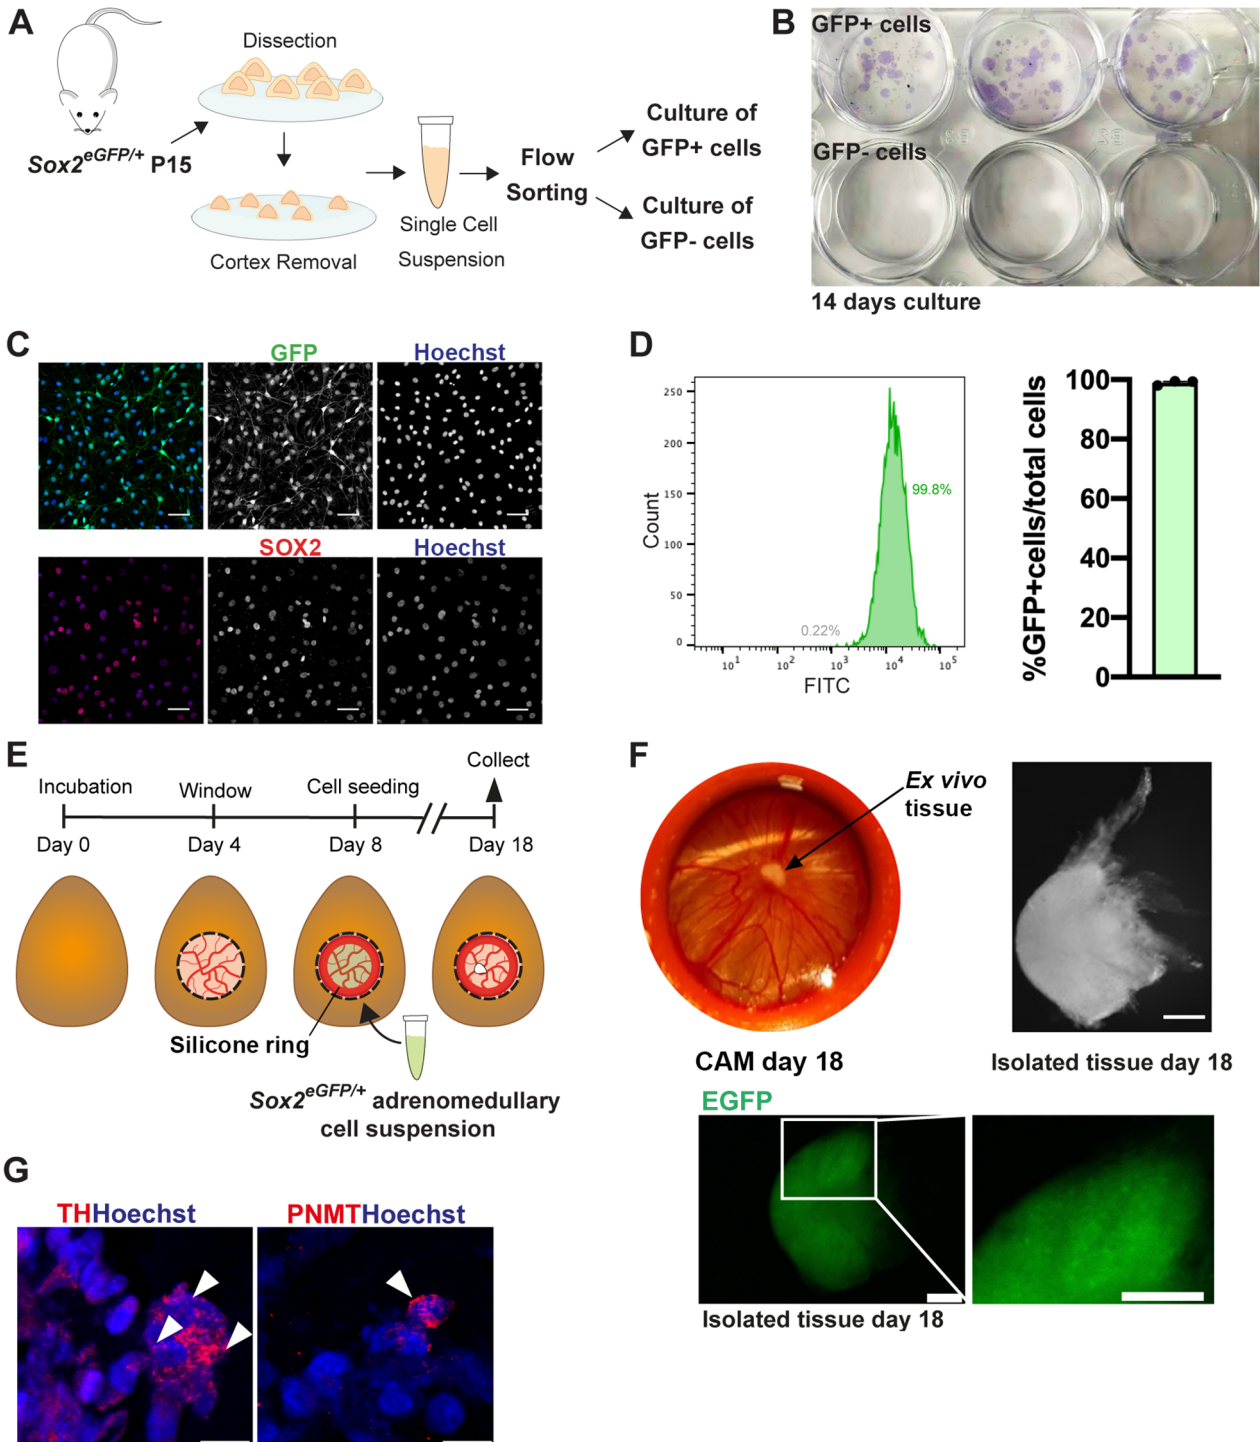

Figure 4

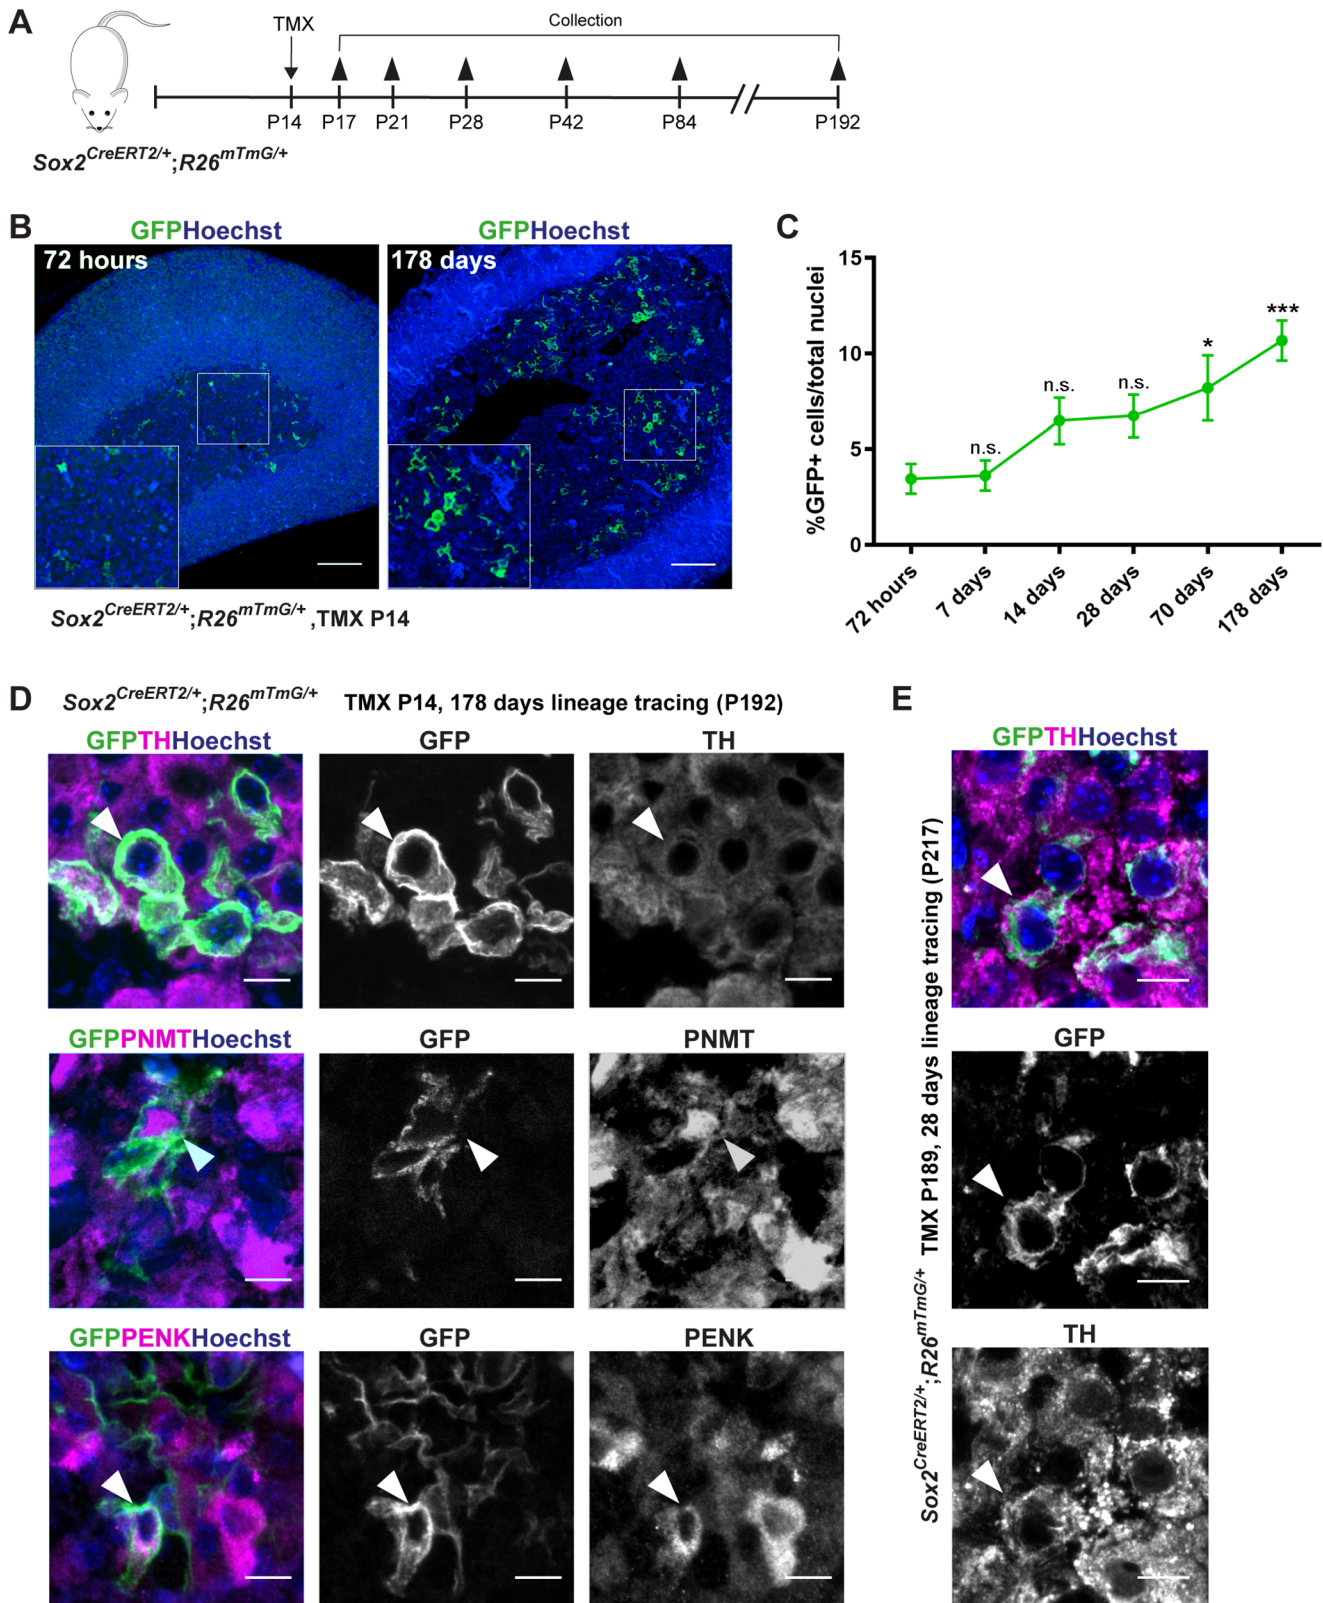

Figure 5

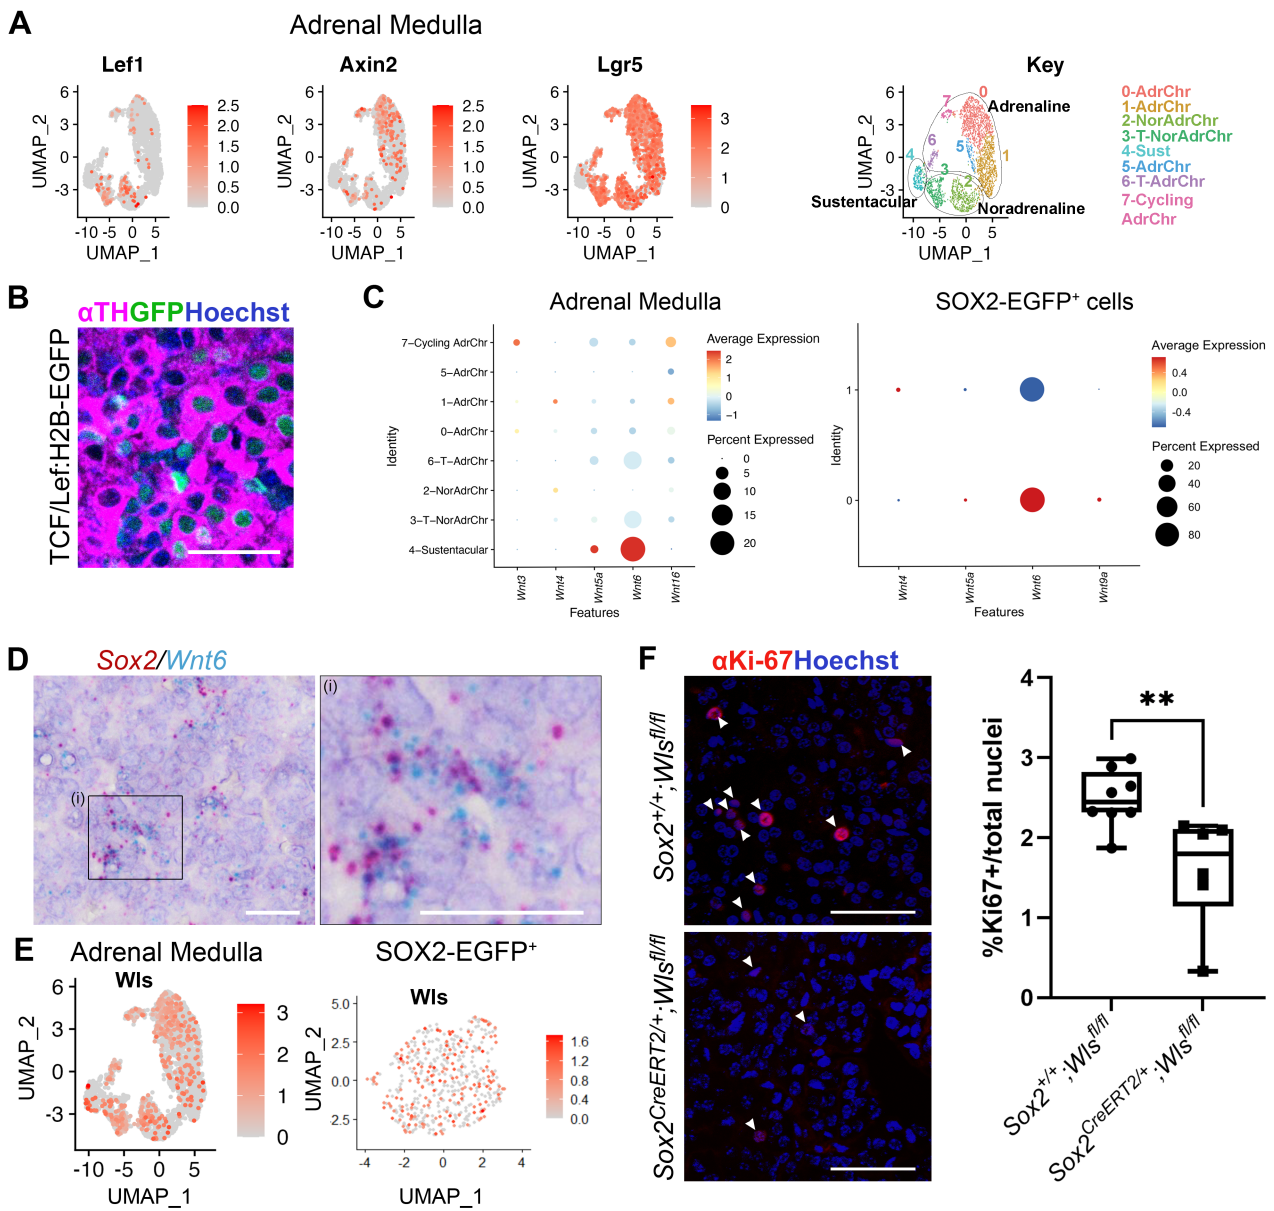



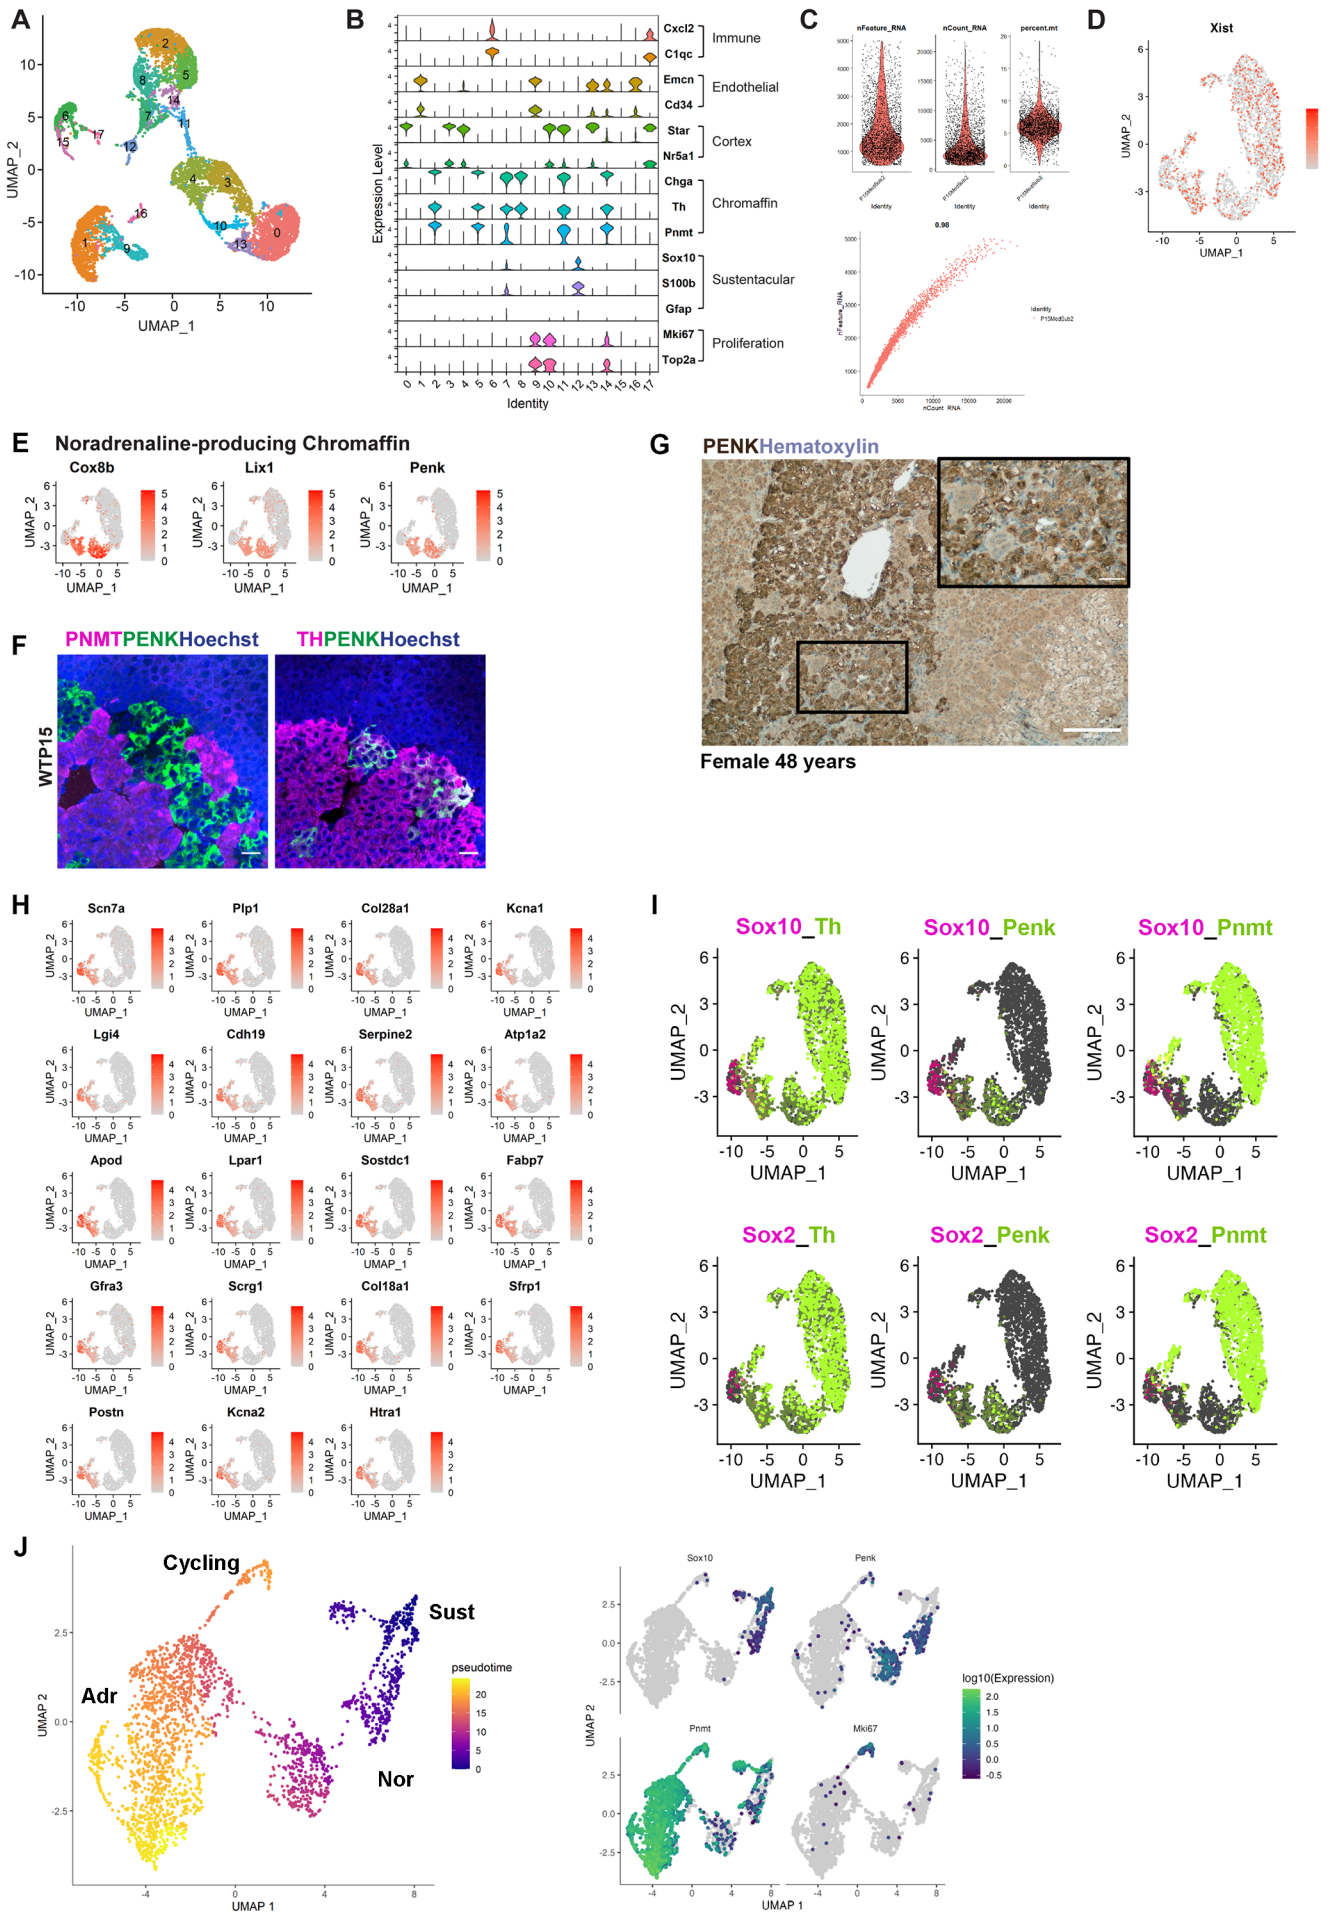



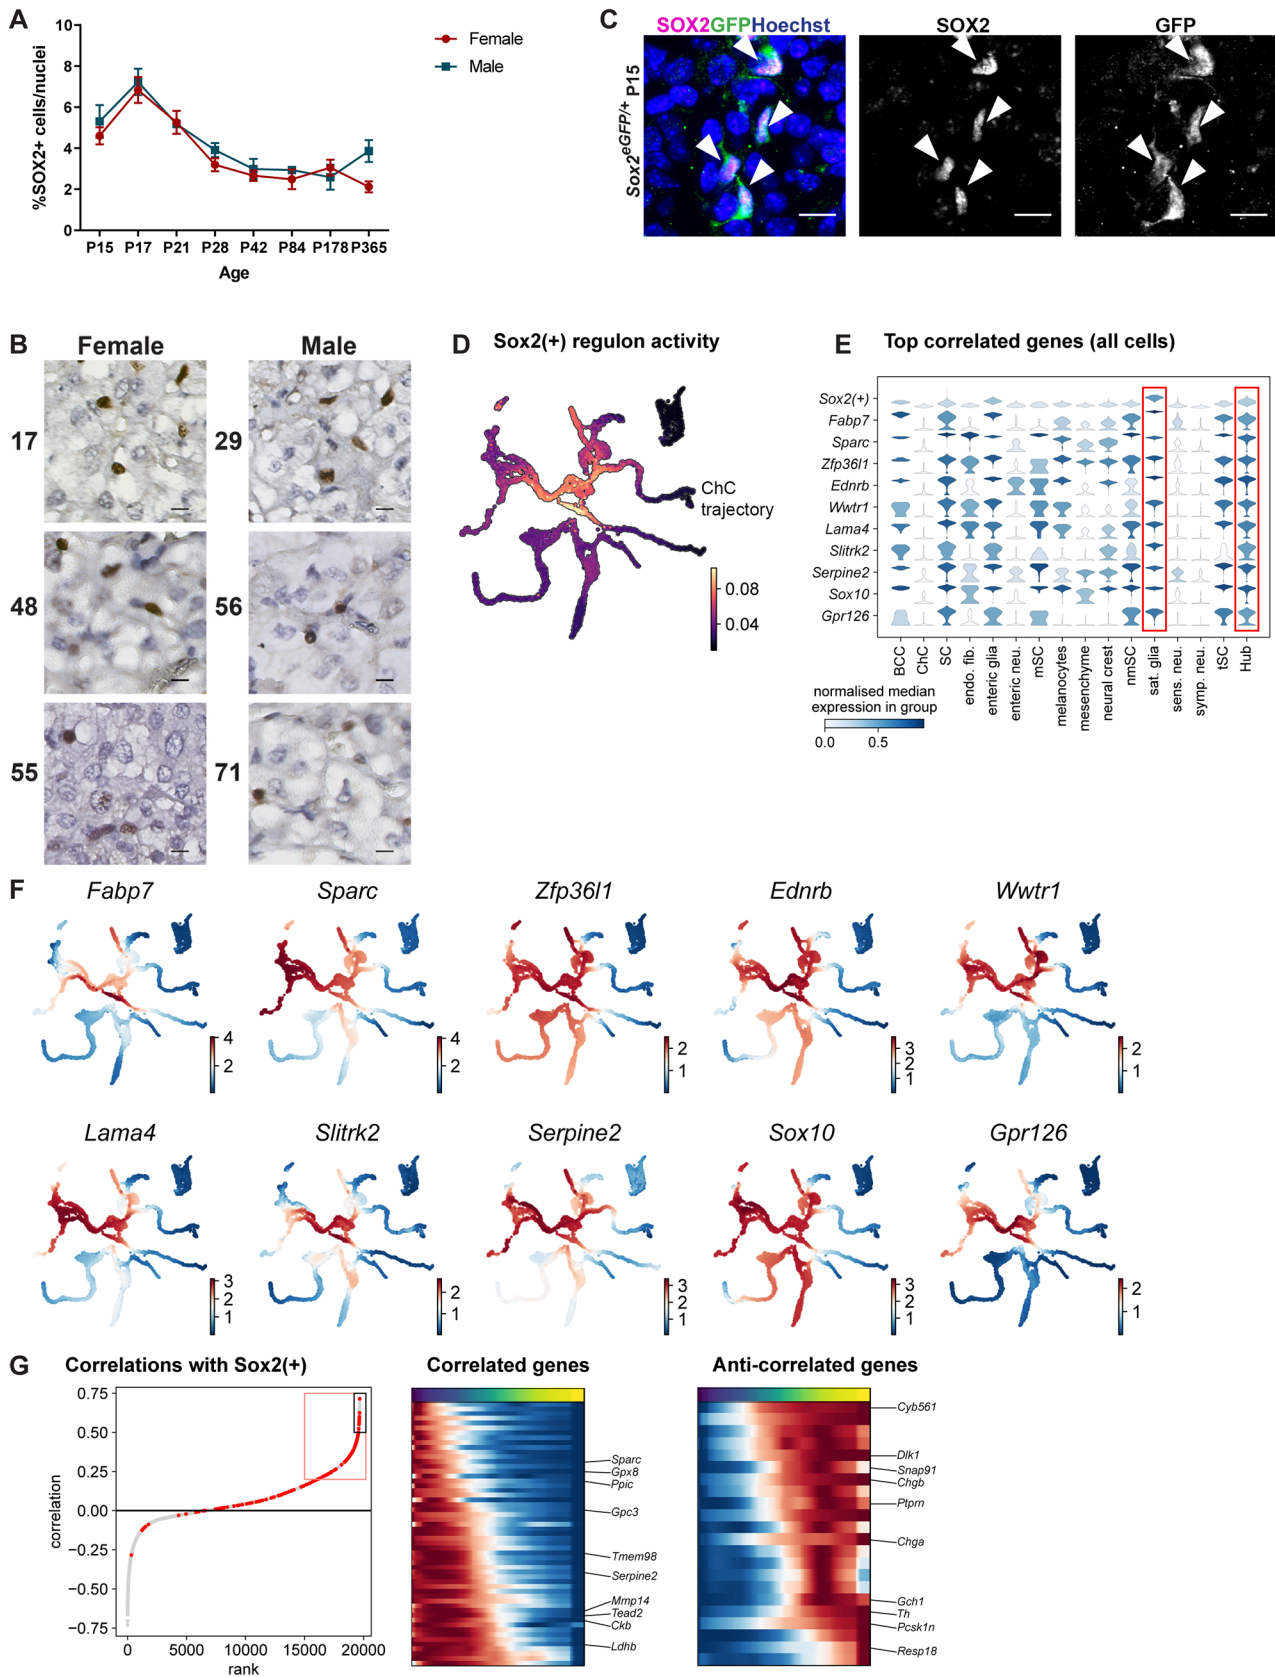

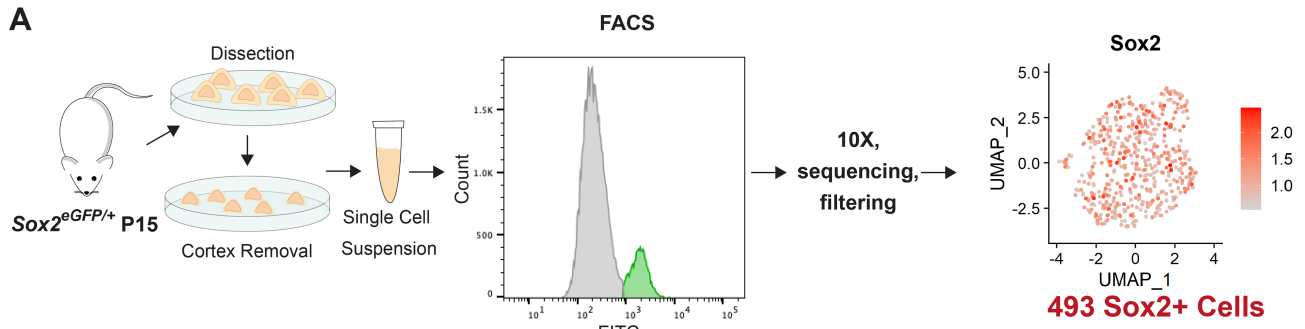

**B** SCPs from *Kameneva et al.*

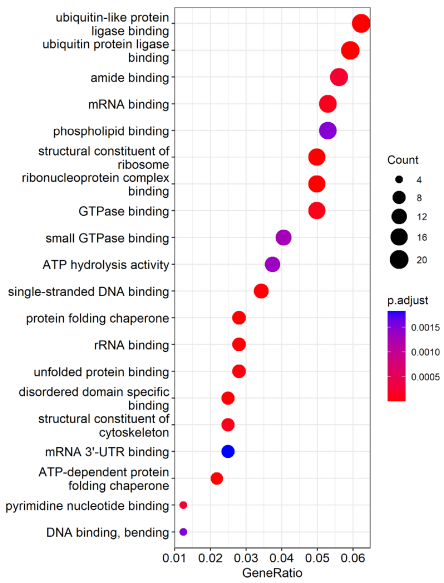

**C** SOX2-enriched

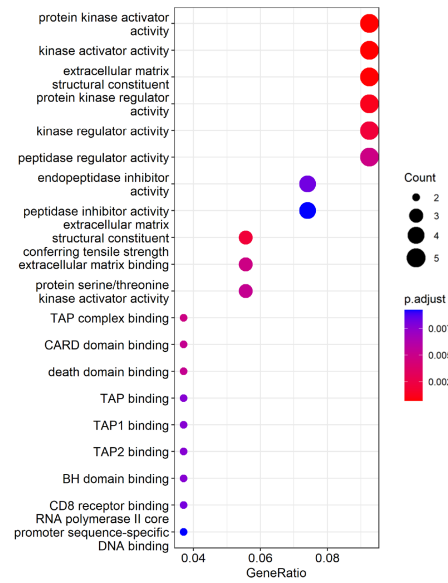

**D**

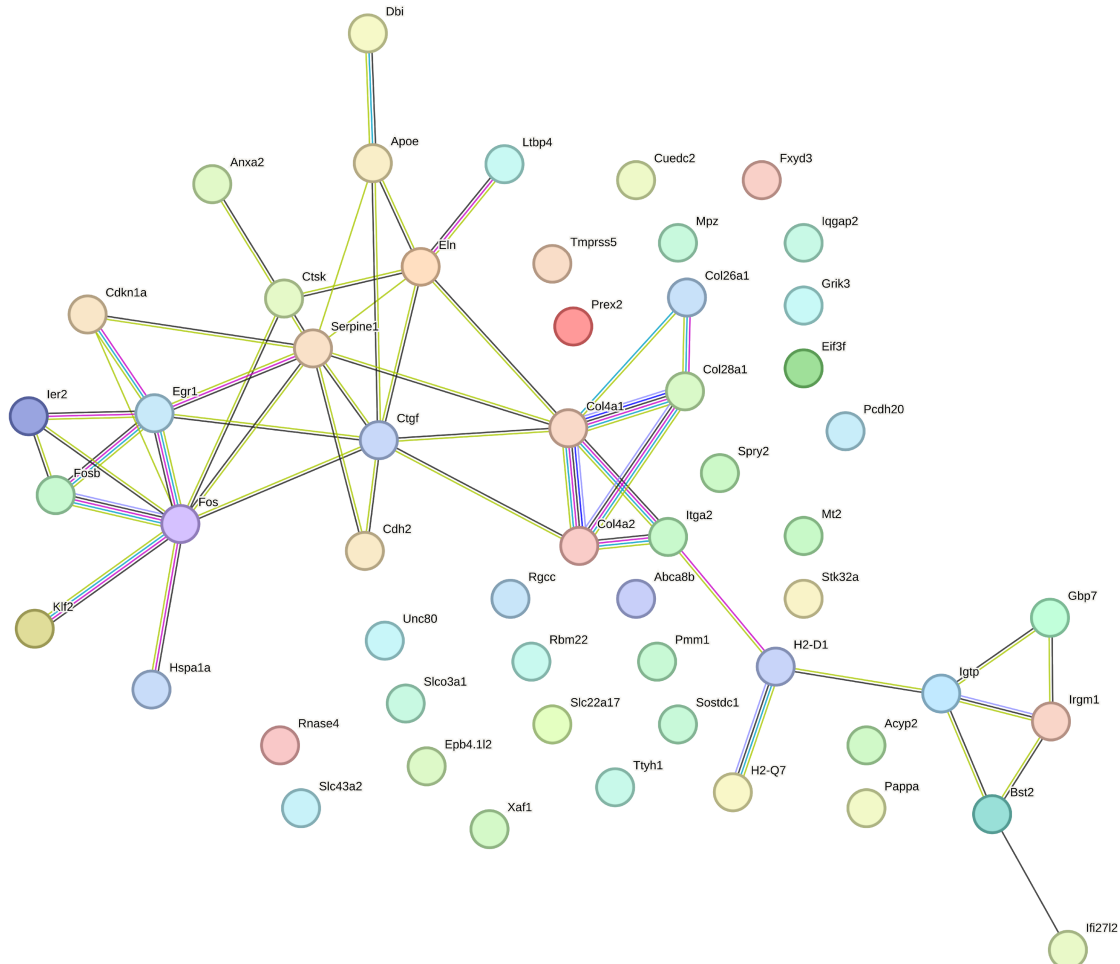

Supplementary Figure 4

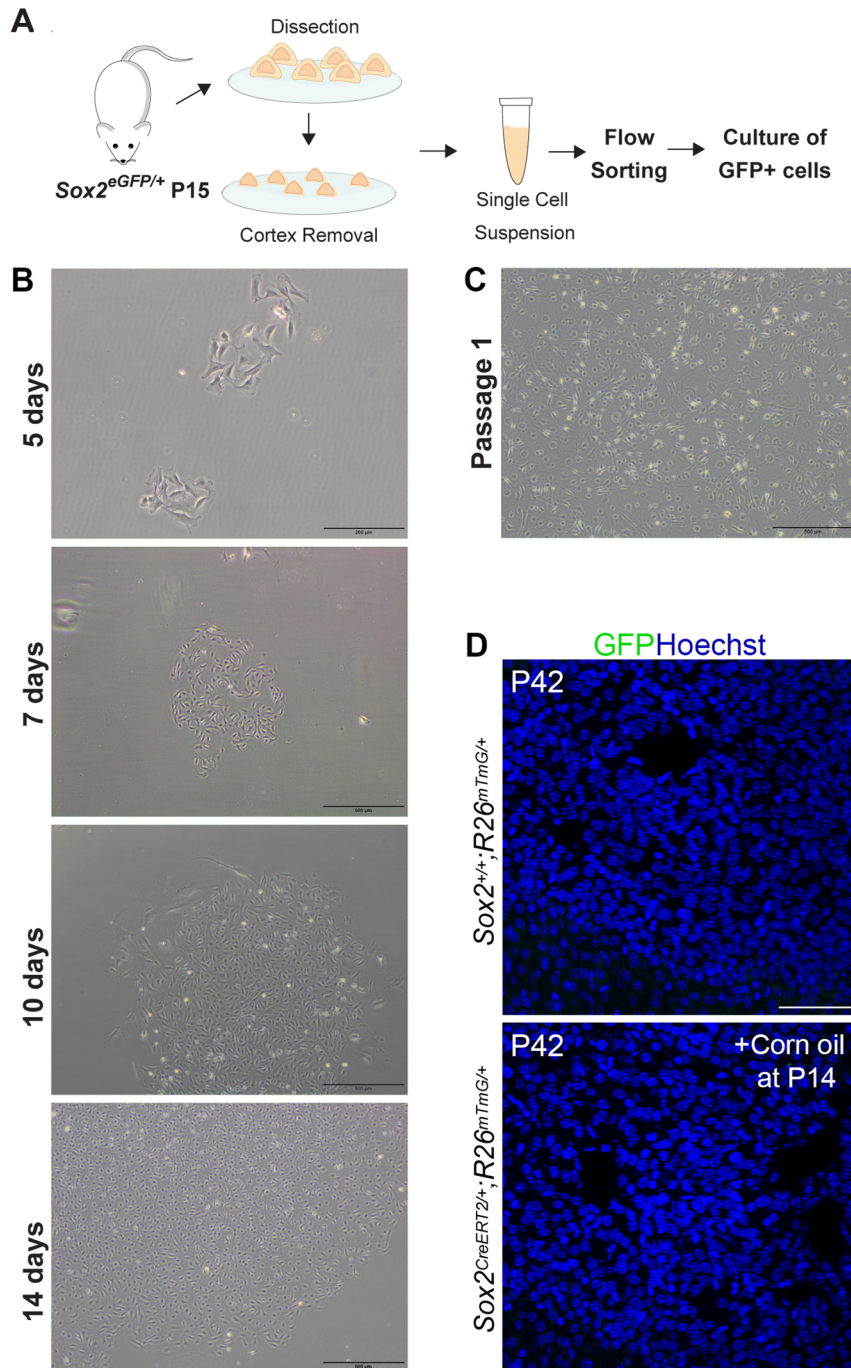

Supplementary Figure 5

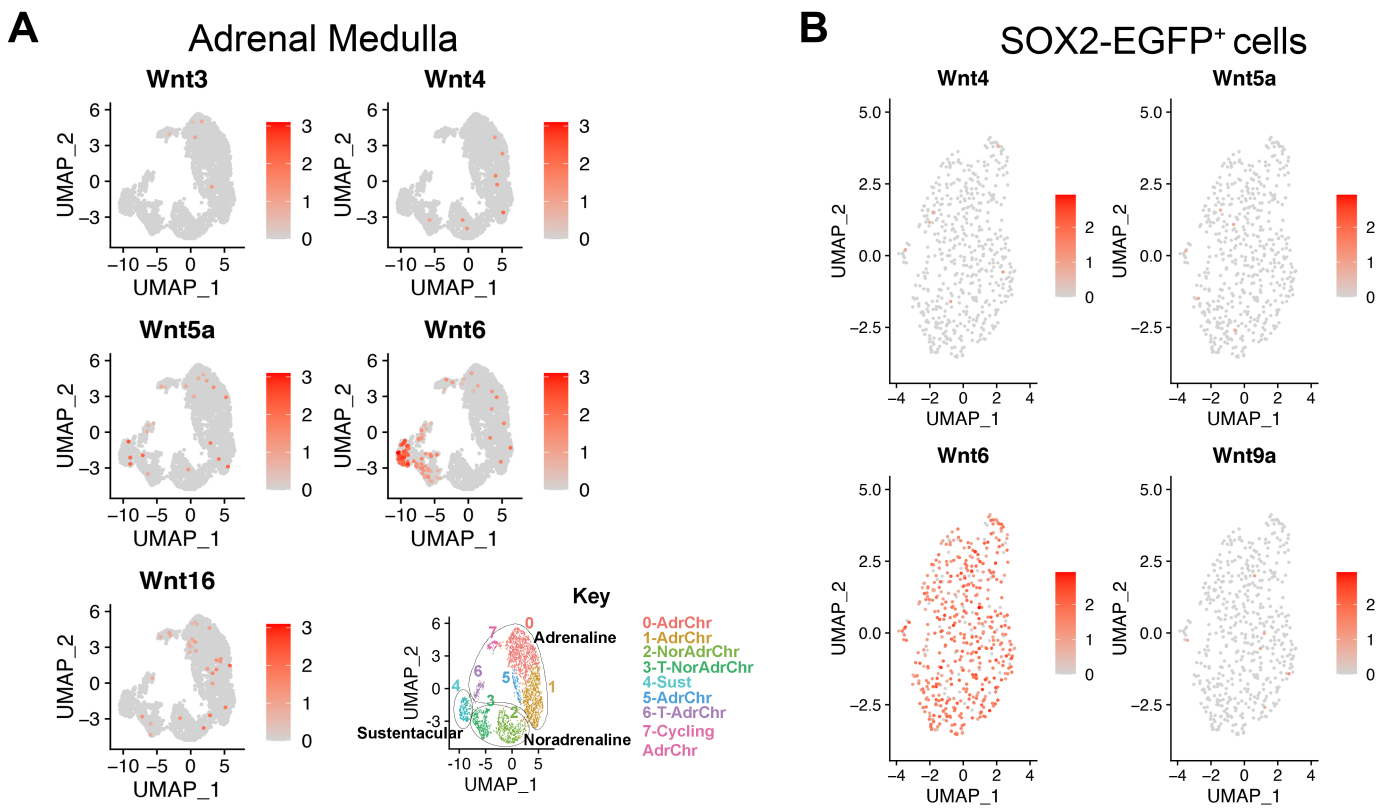

Source: https://www.biorxiv.org/content/biorxiv/early/2023/10/28/2023.10.28.564519.full.pdf
